# Supplementary material for: Bistability in fatty-acid oxidation resulting from substrate inhibition
Source: PLOS journal article supplement (doi:10.1371/journal.pcbi.1009259), 2021-08-12

# Mitochondrial Fatty Acid Oxidation Kinetic Model Extension with SCFAs Regulation

**Definitions of the various functions(CPT1 and NAD production equations are modified to be a function of Acetate concentration in the liver: AcetateMAT=0 with out acetate treatment and AcetateMAT=1 with 3 mM acetate treatment)**

$$\begin{aligned} \ln[ \bullet ] := & \text{CPT1}[sf\_ , V\_ , Kms1\_ , Kms2\_ , Kmp1\_ , Kmp2\_ , Ki1\_ , Keq\_ , S1\_ , S2\_ , P1\_ , \\ & P2\_ , I1\_ , n\_ , vsh\_ , Kmsh\_ , SH1\_ , propacetcpt1\_ , propacetmal\_ , nc\_ ] := \\ & sf * ((1 + SH1) * V) * \left( \frac{S1 * S2}{Kms1 * Kms2} - \frac{P1 * P2}{Kms1 * Kms2 * Keq} \right) \\ & \frac{1}{\left( 1 + \frac{S1}{Kms1} + \frac{P1}{Kmp1} + \left( \frac{I1}{Ki1} \right)^n \right) * \left( 1 + \frac{S2}{Kms2} + \frac{P2}{Kmp2} \right)} \end{aligned}$$

$\ln[ \bullet ] :=$

$$\begin{aligned} \ln[ \bullet ] := & \text{CACT}[Vf\_ , Vr\_ , Kms1\_ , Kms2\_ , Kmp1\_ , Kmp2\_ , Kis1\_ , Kip2\_ , \\ & Keq\_ , S1\_ , S2\_ , P1\_ , P2\_ , vsh\_ , Kmsh\_ , SH1\_ , propacetcact\_ ] := \\ & Vf * \left( S1 * S2 - \frac{P1 * P2}{Keq} \right) \\ & \frac{1}{S1 * S2 + Kms2 * S1 + Kms1 * S2 * \left( 1 + \frac{P2}{Kip2} \right) + \frac{Vf}{Vr * Keq} * \left( Kmp2 * P1 * \left( 1 + \frac{S1}{Kis1} \right) + P2 * (Kmp1 + P1) \right)} \end{aligned}$$

$$\begin{aligned} \ln[ \bullet ] := & \text{CPT2}[sf\_ , V\_ , Kms1\_ , Kms2\_ , Kms3\_ , Kms4\_ , Kms5\_ , Kms6\_ , Kms7\_ , Kms8\_ , Kmp1\_ , Kmp2\_ , Kmp3\_ , \\ & Kmp4\_ , Kmp5\_ , Kmp6\_ , Kmp7\_ , Kmp8\_ , Keq\_ , S1\_ , S2\_ , S3\_ , S4\_ , S5\_ , S6\_ , S7\_ , S8\_ , \\ & P1\_ , P2\_ , P3\_ , P4\_ , P5\_ , P6\_ , P7\_ , P8\_ , vsh\_ , Kmsh\_ , SH1\_ , propacetcpt2\_ ] := \\ & \left( sf * \left( V * \left( \frac{S1 * S8}{Kms1 * Kms8} - \frac{P1 * P8}{Kms1 * Kms8 * Keq} \right) \right) \right) / \left( \left( 1 + \frac{S1}{Kms1} + \frac{P1}{Kmp1} + \frac{S2}{Kms2} + \frac{P2}{Kmp2} + \frac{S3}{Kms3} + \right. \right. \\ & \left. \left. \frac{P3}{Kmp3} + \frac{S4}{Kms4} + \frac{P4}{Kmp4} + \frac{S5}{Kms5} + \frac{P5}{Kmp5} + \frac{S6}{Kms6} + \frac{P6}{Kmp6} + \frac{S7}{Kms7} + \frac{P7}{Kmp7} \right) * \left( 1 + \frac{S8}{Kms8} + \frac{P8}{Kmp8} \right) \right) \end{aligned}$$

$$\begin{aligned} \ln[ \bullet ] := & \text{VLCAD}[sf\_ , V\_ , Kms1\_ , Kms2\_ , Kms3\_ , Kms4\_ , Kmp1\_ , Kmp2\_ , Kmp3\_ , Kmp4\_ , Keq\_ , S1\_ , S2\_ , \\ & S3\_ , S4\_ , P1\_ , P2\_ , P3\_ , P4\_ ] := \frac{sf * V * \left( \frac{S1 * (S4 - P4)}{Kms1 * Kms4} - \frac{P1 * P4}{Kms1 * Kms4 * Keq} \right)}{\left( 1 + \frac{S1}{Kms1} + \frac{P1}{Kmp1} + \frac{S2}{Kms2} + \frac{P2}{Kmp2} + \frac{S3}{Kms3} + \frac{P3}{Kmp3} \right) * \left( 1 + \frac{(S4 - P4)}{Kms4} + \frac{P4}{Kmp4} \right)} \end{aligned}$$

$$\begin{aligned} \ln[ \bullet ] := & \text{LCAD}[sf\_ , V\_ , Kms1\_ , Kms2\_ , Kms3\_ , Kms4\_ , Kms5\_ , Kms6\_ , Kmp1\_ , Kmp2\_ , Kmp3\_ , Kmp4\_ , \\ & Kmp5\_ , Kmp6\_ , Keq\_ , S1\_ , S2\_ , S3\_ , S4\_ , S5\_ , S6\_ , P1\_ , P2\_ , P3\_ , P4\_ , P5\_ , P6\_ ] := \\ & sf * V * \left( \frac{S1 * (S6 - P6)}{Kms1 * Kms6} - \frac{P1 * P6}{Kms1 * Kms6 * Keq} \right) \\ & \frac{1}{\left( 1 + \frac{S1}{Kms1} + \frac{P1}{Kmp1} + \frac{S2}{Kms2} + \frac{P2}{Kmp2} + \frac{S3}{Kms3} + \frac{P3}{Kmp3} + \frac{S4}{Kms4} + \frac{P4}{Kmp4} + \frac{S5}{Kms5} + \frac{P5}{Kmp5} \right) * \left( 1 + \frac{(S6 - P6)}{Kms6} + \frac{P6}{Kmp6} \right)} \end{aligned}$$

$ln[*]:=$  MCAD[sf\_, V\_, Kms1\_, Kms2\_, Kms3\_, Kms4\_, Kms5\_, Kms6\_, Kmp1\_, Kmp2\_, Kmp3\_, Kmp4\_, Kmp5\_, Kmp6\_, Keq\_, S1\_, S2\_, S3\_, S4\_, S5\_, S6\_, P1\_, P2\_, P3\_, P4\_, P5\_, P6\_] :=

$$\frac{sf * V * \left( \frac{S1 * (S6 - P6)}{Kms1 * Kms6} - \frac{P1 * P6}{Kms1 * Kms6 * Keq} \right)}{\left( 1 + \frac{S1}{Kms1} + \frac{P1}{Kmp1} + \frac{S2}{Kms2} + \frac{P2}{Kmp2} + \frac{S3}{Kms3} + \frac{P3}{Kmp3} + \frac{S4}{Kms4} + \frac{P4}{Kmp4} + \frac{S5}{Kms5} + \frac{P5}{Kmp5} \right) * \left( 1 + \frac{(S6 - P6)}{Kms6} + \frac{P6}{Kmp6} \right)}$$

$ln[*]:=$  SCAD[sf\_, V\_, Kms1\_, Kms2\_, Kms3\_, Kmp1\_, Kmp2\_, Kmp3\_, Keq\_, S1\_,

$$S2_, S3_, P1_, P2_, P3_] := \frac{sf * V * \left( \frac{S1 * (S3 - P3)}{Kms1 * Kms3} - \frac{P1 * P3}{Kms1 * Kms3 * Keq} \right)}{\left( 1 + \frac{S1}{Kms1} + \frac{P1}{Kmp1} + \frac{S2}{Kms2} + \frac{P2}{Kmp2} \right) * \left( 1 + \frac{(S3 - P3)}{Kms3} + \frac{P3}{Kmp3} \right)}$$

$ln[*]:=$  CROT[sf\_, V\_, Kms1\_, Kms2\_, Kms3\_, Kms4\_, Kms5\_, Kms6\_, Kms7\_, Kmp1\_, Kmp2\_, Kmp3\_, Kmp4\_, Kmp5\_, Kmp6\_, Kmp7\_, Ki1\_, Keq\_, S1\_, S2\_, S3\_, S4\_, S5\_, S6\_, S7\_, P1\_, P2\_, P3\_, P4\_, P5\_, P6\_, P7\_, I1\_] :=

$$\frac{sf * V * \left( \frac{S1}{Kms1} - \frac{P1}{Kms1 * Keq} \right)}{1 + \frac{S1}{Kms1} + \frac{P1}{Kmp1} + \frac{S2}{Kms2} + \frac{P2}{Kmp2} + \frac{S3}{Kms3} + \frac{P3}{Kmp3} + \frac{S4}{Kms4} + \frac{P4}{Kmp4} + \frac{S5}{Kms5} + \frac{P5}{Kmp5} + \frac{S6}{Kms6} + \frac{P6}{Kmp6} + \frac{S7}{Kms7} + \frac{P7}{Kmp7} + \frac{I1}{Ki1}}$$

$ln[*]:=$  MSCHAD[sf\_, V\_, Kms1\_, Kms2\_, Kms3\_, Kms4\_, Kms5\_, Kms6\_, Kms7\_, Kms8\_, Kmp1\_, Kmp2\_, Kmp3\_, Kmp4\_, Kmp5\_, Kmp6\_, Kmp7\_, Kmp8\_, Keq\_, S1\_, S2\_, S3\_, S4\_, S5\_, S6\_, S7\_, S8\_,

$$P1_, P2_, P3_, P4_, P5_, P6_, P7_, P8_] := \left( sf * V * \left( \frac{S1 * (S8 - P8)}{Kms1 * Kms8} - \frac{P1 * P8}{Kms1 * Kms8 * Keq} \right) \right) / \left( \left( 1 + \frac{S1}{Kms1} + \frac{P1}{Kmp1} + \frac{S2}{Kms2} + \frac{P2}{Kmp2} + \frac{S3}{Kms3} + \frac{P3}{Kmp3} + \frac{S4}{Kms4} + \frac{P4}{Kmp4} + \frac{S5}{Kms5} + \frac{P5}{Kmp5} + \frac{S6}{Kms6} + \frac{P6}{Kmp6} + \frac{S7}{Kms7} + \frac{P7}{Kmp7} \right) * \left( 1 + \frac{(S8 - P8)}{Kms8} + \frac{P8}{Kmp8} \right) \right)$$

$ln[*]:=$  MCKATA[sf\_, V\_, Kms1\_, Kms2\_, Kms3\_, Kms4\_, Kms5\_, Kms6\_, Kms7\_, Kms8\_, Kmp1\_, Kmp2\_, Kmp3\_, Kmp4\_, Kmp5\_, Kmp6\_, Kmp7\_, Kmp8\_, Keq\_, S1\_, S2\_, S3\_, S4\_, S5\_, S6\_, S7\_, S8\_, P1\_, P2\_, P3\_, P4\_, P5\_, P6\_, P7\_, P8\_, E1\_, KmE1\_, nm\_, vsh\_,

$$KmsH_, SH1_, propacetmckat_] := \left( sf * \left( V * \left( \frac{S1 * S8}{Kms1 * Kms8} - \frac{P1 * P8}{Kms1 * Kms8 * Keq} \right) \right) \right) / \left( \left( 1 + \frac{S1}{Kms1} + \frac{P1}{Kmp1} + \frac{S2}{Kms2} + \frac{P2}{Kmp2} + \frac{S3}{Kms3} + \frac{P3}{Kmp3} + \frac{S4}{Kms4} + \frac{P4}{Kmp4} + \frac{S5}{Kms5} + \frac{P5}{Kmp5} + \frac{S6}{Kms6} + \frac{P6}{Kmp6} + \frac{S7}{Kms7} + \frac{P7}{Kmp7} + \frac{P8}{Kmp8} \right) * \left( 1 + \frac{S8}{Kms8} + \frac{P8}{Kmp8} \right) \right)$$

$ln[*]:=$  MCKATB[sf\_, V\_, Kms1\_, Kms2\_, Kms3\_, Kms4\_, Kms5\_, Kms6\_, Kms7\_, Kms8\_, Kmp1\_, Kmp2\_, Kmp3\_, Kmp4\_, Kmp5\_, Kmp6\_, Kmp7\_, Kmp8\_, Keq\_, S1\_, S2\_, S3\_, S4\_, S5\_, S6\_, S7\_, S8\_, P1\_, P2\_, P3\_, P4\_, P5\_, P6\_, P7\_, P8\_, E1\_, KmE1\_, nm\_, vsh\_,

$$KmsH_, SH1_, propacetmckat_] := \left( sf * \left( V * \left( \frac{S1 * S8}{Kms1 * Kms8} - \frac{P8 * P8}{Kms1 * Kms8 * Keq} \right) \right) \right) / \left( \left( 1 + \frac{S1}{Kms1} + \frac{P1}{Kmp1} + \frac{S2}{Kms2} + \frac{P2}{Kmp2} + \frac{S3}{Kms3} + \frac{P3}{Kmp3} + \frac{S4}{Kms4} + \frac{P4}{Kmp4} + \frac{S5}{Kms5} + \frac{P5}{Kmp5} + \frac{S6}{Kms6} + \frac{P6}{Kmp6} + \frac{S7}{Kms7} + \frac{P7}{Kmp7} + \frac{P8}{Kmp8} \right) * \left( 1 + \frac{S8}{Kms8} + \frac{P8}{Kmp8} \right) \right) (* * (1 + nm * \left( \frac{E1}{KmE1} \right)^1) *)$$

$$\begin{aligned} \ln[*] := & \text{MTP}[sf\_ , V\_ , Kms1\_ , Kms2\_ , Kms3\_ , Kms4\_ , Kms5\_ , Kms7\_ , Kms8\_ , Kmp1\_ , \\ & Kmp2\_ , Kmp3\_ , Kmp4\_ , Kmp5\_ , Kmp6\_ , Kmp7\_ , Kmp8\_ , Ki1\_ , Keq\_ , S1\_ , S2\_ , \\ & S3\_ , S4\_ , S5\_ , S7\_ , S8\_ , P1\_ , P2\_ , P3\_ , P4\_ , P5\_ , P6\_ , P7\_ , P8\_ , I1\_ ] := \\ & \left( sf * V * \left( \frac{S1 * (S7 - P7) * S8}{Kms1 * Kms7 * Kms8} - \frac{P1 * P7 * P8}{Kms1 * Kms7 * Kms8 * Keq} \right) \right) / \\ & \left( \left( 1 + \frac{S1}{Kms1} + \frac{P1}{Kmp1} + \frac{S2}{Kms2} + \frac{P2}{Kmp2} + \frac{S3}{Kms3} + \frac{P3}{Kmp3} + \frac{S4}{Kms4} + \frac{P4}{Kmp4} + \frac{S5}{Kms5} + \frac{P5}{Kmp5} + \frac{P6}{Kmp6} + \frac{I1}{Ki1} \right) * \right. \\ & \left. \left( 1 + \frac{(S7 - P7)}{Kms7} + \frac{P7}{Kmp7} \right) * \left( 1 + \frac{S8}{Kms8} + \frac{P8}{Kmp8} \right) \right) \end{aligned}$$

$$\ln[*] := \text{RES}[Ks\_ , S\_ , K1\_ ] := Ks * (S - K1)$$

$$\text{OXPH}[V\_ , Kms1\_ , Kmp1\_ , S1\_ , P1\_ , vsh\_ , Kmsh\_ , SH1\_ ] := \frac{((1 + SH1) * V) * \left( \frac{S1}{Kms1} \right)}{\left( 1 + \frac{S1}{Kms1} + \frac{P1}{Kmp1} \right)}$$

$$\ln[*] := \text{PDH}[V\_ , Kms1\_ , Kmp1\_ , S1\_ , P1\_ ] := \frac{V * \left( \frac{S1}{Kms1} \right)}{\left( 1 + \frac{S1}{Kms1} + \frac{P1}{Kmp1} \right)}$$

$\ln[*] :=$

## Define the differential equations

$$\begin{aligned} \text{Odes} = \{ & \\ & \text{C16AcylCarCYT}'[t] == \frac{vcpt1C16 - vcactC16}{VCYT}, \\ & \text{C16AcylCarMAT}'[t] == \frac{vcactC16 - vcpt2C16}{VMAT}, \\ & \text{C16AcylCoAMAT}'[t] == \frac{vcpt2C16 - vvlcadC16 - vlcadC16}{VMAT}, \\ & \text{C16EnoylCoAMAT}'[t] == \frac{vvlcadC16 + vlcadC16 - vcrotC16 - vmtpC16}{VMAT}, \\ & \text{C16HydroxyacylCoAMAT}'[t] == \frac{vcrotC16 - vmschadC16}{VMAT}, \\ & \text{C16KetoacylCoAMAT}'[t] == \frac{vmschadC16 - vmckatC16}{VMAT}, \\ & \text{C14AcylCarCYT}'[t] == \frac{-vcactC14}{VCYT}, \\ & \text{C14AcylCarMAT}'[t] == \frac{vcactC14 - vcpt2C14}{VMAT}, \\ & \text{C14AcylCoAMAT}'[t] == \frac{vcpt2C14 + vmtpC16 + vmckatC16 - vvlcadC14 - vlcadC14}{VMAT}, \\ & \text{C14EnoylCoAMAT}'[t] == \frac{vvlcadC14 + vlcadC14 - vcrotC14 - vmtpC14}{VMAT}, \\ & \text{C14HydroxyacylCoAMAT}'[t] == \frac{vcrotC14 - vmschadC14}{VMAT}, \\ & \text{C14KetoacylCoAMAT}'[t] == \frac{vmschadC14 - vmckatC14}{VMAT}, \\ & \end{aligned}$$

$$\begin{aligned}
C12AcylCarCYT' [t] &= \frac{-vcactC12}{VCYT}, \\
C12AcylCarMAT' [t] &= \frac{vcactC12 - vcpt2C12}{VMAT}, \\
C12AcylCoAMAT' [t] &= \frac{vcpt2C12 + vmtpC14 + vmckatC14 - vvlcadC12 - vlcadC12 - vmcadC12}{VMAT}, \\
C12EnoylCoAMAT' [t] &= \frac{vvlcadC12 + vlcadC12 + vmcadC12 - vcrotC12 - vmtpC12}{VMAT}, \\
C12HydroxyacylCoAMAT' [t] &= \frac{vcrotC12 - vmschadC12}{VMAT}, \\
C12KetoacylCoAMAT' [t] &= \frac{vmschadC12 - vmckatC12}{VMAT}, \\
C10AcylCarCYT' [t] &= \frac{-vcactC10}{VCYT}, \\
C10AcylCarMAT' [t] &= \frac{vcactC10 - vcpt2C10}{VMAT}, \\
C10AcylCoAMAT' [t] &= \frac{vcpt2C10 + vmtpC12 + vmckatC12 - vlcadC10 - vmcadC10}{VMAT}, \\
C10EnoylCoAMAT' [t] &= \frac{vlcadC10 + vmcadC10 - vcrotC10 - vmtpC10}{VMAT}, \\
C10HydroxyacylCoAMAT' [t] &= \frac{vcrotC10 - vmschadC10}{VMAT}, \\
C10KetoacylCoAMAT' [t] &= \frac{vmschadC10 - vmckatC10}{VMAT}, \\
C8AcylCarCYT' [t] &= \frac{-vcactC8}{VCYT}, \\
C8AcylCarMAT' [t] &= \frac{vcactC8 - vcpt2C8}{VMAT}, \\
C8AcylCoAMAT' [t] &= \frac{vcpt2C8 + vmtpC10 + vmckatC10 - vlcadC8 - vmcadC8}{VMAT}, \\
C8EnoylCoAMAT' [t] &= \frac{vlcadC8 + vmcadC8 - vcrotC8 - vmtpC8}{VMAT}, \\
C8HydroxyacylCoAMAT' [t] &= \frac{vcrotC8 - vmschadC8}{VMAT}, \\
C8KetoacylCoAMAT' [t] &= \frac{vmschadC8 - vmckatC8}{VMAT}, \\
C6AcylCarCYT' [t] &= \frac{-vcactC6}{VCYT}, \\
C6AcylCarMAT' [t] &= \frac{vcactC6 - vcpt2C6}{VMAT}, \\
C6AcylCoAMAT' [t] &= \frac{vcpt2C6 + vmtpC8 + vmckatC8 - vmcadC6 - vscadC6}{VMAT}, \\
C6EnoylCoAMAT' [t] &= \frac{vmcadC6 + vscadC6 - vcrotC6}{VMAT}, \\
C6HydroxyacylCoAMAT' [t] &= \frac{vcrotC6 - vmschadC6}{VMAT},
\end{aligned}$$

$$\begin{aligned} \text{C6KetoacylCoAMAT}'[t] &= \frac{\text{vmschadC6} - \text{vmckatC6}}{\text{VMAT}}, \\ \text{C4AcylCarCYT}'[t] &= \frac{-\text{vcactC4}}{\text{VCYT}}, \\ \text{C4AcylCarMAT}'[t] &= \frac{\text{vcactC4} - \text{vcpt2C4}}{\text{VMAT}}, \\ \text{C4AcylCoAMAT}'[t] &= \frac{\text{vcpt2C4} + \text{vmckatC6} - \text{vmcadC4} - \text{vscadC4}}{\text{VMAT}}, \\ \text{C4EnoylCoAMAT}'[t] &= \frac{\text{vmcadC4} + \text{vscadC4} - \text{vcrotC4}}{\text{VMAT}}, \\ \text{C4HydroxyacylCoAMAT}'[t] &= \frac{\text{vcrotC4} - \text{vmschadC4}}{\text{VMAT}}, \\ \text{C4AcetoacylCoAMAT}'[t] &= \frac{\text{vmschadC4} - \text{vmckatC4}}{\text{VMAT}}, \\ \text{AcetylCoAMAT}'[t] &= \\ &\frac{1}{\text{VMAT}} (\text{vmtpC16} + \text{vmckatC16} + \text{vmtpC14} + \text{vmckatC14} + \text{vmtpC12} + \text{vmckatC12} + \text{vmtpC10} + \\ &\quad \text{vmckatC10} + \text{vmtpC8} + \text{vmckatC8} + \text{vmckatC6} + 2 * \text{vmckatC4} - \text{vacesink}), (*-\text{vacesink}*) \\ \text{FADHMAT}'[t] &= \frac{1}{\text{VMAT}} (\text{vvlcadC16} + \text{vvlcadC14} + \text{vvlcadC12} + \text{vlcadC16} + \\ &\quad \text{vlcadC14} + \text{vlcadC12} + \text{vlcadC10} + \text{vlcadC8} + \text{vmcadC12} + \text{vmcadC10} + \\ &\quad \text{vmcadC8} + \text{vmcadC6} + \text{vmcadC4} + \text{vscadC6} + \text{vscadC4} - \text{vfadhsink}), \\ \text{NADHMAT}'[t] &= \frac{1}{\text{VMAT}} (\text{vmtpC16} + \text{vmtpC14} + \text{vmtpC12} + \text{vmtpC10} + \text{vmtpC8} + \\ &\quad \text{vmschadC16} + \text{vmschadC14} + \text{vmschadC12} + \text{vmschadC10} + \\ &\quad \text{vmschadC8} + \text{vmschadC6} + \text{vmschadC4} + \text{vpdhnad} - \text{voxphnad}) \\ &}; \end{aligned}$$

```
RateEqs = {vcpt1C16 → CPT1[sfcpt1C16, Vcpt1, Kmcpt1C16AcylCoACYT,
  Kmcpt1CarCYT, Kmcpt1C16AcylCarCYT, Kmcpt1CoACYT, Kicpt1MalCoACYT,
  Keqcpt1, C16AcylCoACYT, CarCYT, C16AcylCarCYT[t], CoACYT, MalCoACYT,
  ncpt1, vmct1acet, kmct1acet, AcetateMAT, propacetcpt1, propacetmal, nc],
vcactC16 → CACT[Vfcact, Vrcact, KmcactC16AcylCarCYT, KmcactCarMAT,
  KmcactC16AcylCarMAT, KmcactCarCYT, KicactC16AcylCarCYT,
  KicactCarCYT, Keqcact, C16AcylCarCYT[t], CarMAT, C16AcylCarMAT[t],
  CarCYT, vmct1acet, kmct1acet, AcetateMAT, propacetcact],
vcactC14 → CACT[Vfcact, Vrcact, KmcactC14AcylCarCYT, KmcactCarMAT,
  KmcactC14AcylCarMAT, KmcactCarCYT, KicactC14AcylCarCYT, KicactCarCYT,
  Keqcact, C14AcylCarCYT[t], CarMAT, C14AcylCarMAT[t], CarCYT,
  vmct1acet, kmct1acet, AcetateMAT, propacetcact], vcactC12 →
CACT[Vfcact, Vrcact, KmcactC12AcylCarCYT, KmcactCarMAT, KmcactC12AcylCarMAT,
  KmcactCarCYT, KicactC12AcylCarCYT, KicactCarCYT, Keqcact, C12AcylCarCYT[t],
  CarMAT, C12AcylCarMAT[t], CarCYT, vmct1acet, kmct1acet, AcetateMAT, propacetcact],
vcactC10 → CACT[Vfcact, Vrcact, KmcactC10AcylCarCYT, KmcactCarMAT,
  KmcactC10AcylCarMAT, KmcactCarCYT, KicactC10AcylCarCYT,
  KicactCarCYT, Keqcact, C10AcylCarCYT[t], CarMAT, C10AcylCarMAT[t],
  CarCYT, vmct1acet, kmct1acet, AcetateMAT, propacetcact],
vcactC8 → CACT[Vfcact, Vrcact, KmcactC8AcylCarCYT, KmcactCarMAT, KmcactC8AcylCarMAT,
  KmcactCarCYT, KicactC8AcylCarCYT, KicactCarCYT, Keqcact, C8AcylCarCYT[t],
  CarMAT, C8AcylCarMAT[t], CarCYT, vmct1acet, kmct1acet, AcetateMAT, propacetcact],
vcactC6 → CACT[Vfcact, Vrcact, KmcactC6AcylCarCYT, KmcactCarMAT, KmcactC6AcylCarMAT,
```

KmcactCarCYT, KicactC6AcylCarCYT, KicactCarCYT, Keqcact, C6AcylCarCYT[t],  
 CarMAT, C6AcylCarMAT[t], CarCYT, vmct1acet, kmct1acet, AcetateMAT, propacetcact],  
 vcactC4 → CACT[Vfcact, Vrcact, KmcactC4AcylCarCYT, KmcactCarMAT, KmcactC4AcylCarMAT,  
 KmcactCarCYT, KicactC4AcylCarCYT, KicactCarCYT, Keqcact, C4AcylCarCYT[t],  
 CarMAT, C4AcylCarMAT[t], CarCYT, vmct1acet, kmct1acet, AcetateMAT, propacetcact],  
 vcpt2C16 → CPT2[sfcpt2C16, Vcpt2, Kmcpt2C16AcylCarMAT, Kmcpt2C14AcylCarMAT,  
 Kmcpt2C12AcylCarMAT, Kmcpt2C10AcylCarMAT, Kmcpt2C8AcylCarMAT, Kmcpt2C6AcylCarMAT,  
 Kmcpt2C4AcylCarMAT, Kmcpt2CoAMAT, Kmcpt2C16AcylCoAMAT, Kmcpt2C14AcylCoAMAT,  
 Kmcpt2C12AcylCoAMAT, Kmcpt2C10AcylCoAMAT, Kmcpt2C8AcylCoAMAT,  
 Kmcpt2C6AcylCoAMAT, Kmcpt2C4AcylCoAMAT, Kmcpt2CarMAT, Keqcpt2, C16AcylCarMAT[t],  
 C14AcylCarMAT[t], C12AcylCarMAT[t], C10AcylCarMAT[t], C8AcylCarMAT[t],  
 C6AcylCarMAT[t], C4AcylCarMAT[t], CoAMAT, C16AcylCoAMAT[t], C14AcylCoAMAT[t],  
 C12AcylCoAMAT[t], C10AcylCoAMAT[t], C8AcylCoAMAT[t], C6AcylCoAMAT[t],  
 C4AcylCoAMAT[t], CarMAT, vmct1acet, kmct1acet, AcetateMAT, propacetcpt2],  
 vcpt2C14 → CPT2[sfcpt2C14, Vcpt2, Kmcpt2C14AcylCarMAT, Kmcpt2C16AcylCarMAT,  
 Kmcpt2C12AcylCarMAT, Kmcpt2C10AcylCarMAT, Kmcpt2C8AcylCarMAT, Kmcpt2C6AcylCarMAT,  
 Kmcpt2C4AcylCoAMAT, Kmcpt2CoAMAT, Kmcpt2C14AcylCoAMAT, Kmcpt2C16AcylCoAMAT,  
 Kmcpt2C12AcylCoAMAT, Kmcpt2C10AcylCoAMAT, Kmcpt2C8AcylCoAMAT,  
 Kmcpt2C6AcylCoAMAT, Kmcpt2C4AcylCoAMAT, Kmcpt2CarMAT, Keqcpt2, C14AcylCarMAT[t],  
 C16AcylCarMAT[t], C12AcylCarMAT[t], C10AcylCarMAT[t], C8AcylCarMAT[t],  
 C6AcylCarMAT[t], C4AcylCarMAT[t], CoAMAT, C14AcylCoAMAT[t], C16AcylCoAMAT[t],  
 C12AcylCoAMAT[t], C10AcylCoAMAT[t], C8AcylCoAMAT[t], C6AcylCoAMAT[t],  
 C4AcylCoAMAT[t], CarMAT, vmct1acet, kmct1acet, AcetateMAT, propacetcpt2],  
 vcpt2C12 → CPT2[sfcpt2C12, Vcpt2, Kmcpt2C12AcylCarMAT, Kmcpt2C16AcylCarMAT,  
 Kmcpt2C14AcylCarMAT, Kmcpt2C10AcylCarMAT, Kmcpt2C8AcylCarMAT, Kmcpt2C6AcylCarMAT,  
 Kmcpt2C4AcylCarMAT, Kmcpt2CoAMAT, Kmcpt2C12AcylCoAMAT, Kmcpt2C16AcylCoAMAT,  
 Kmcpt2C14AcylCoAMAT, Kmcpt2C10AcylCoAMAT, Kmcpt2C8AcylCoAMAT,  
 Kmcpt2C6AcylCoAMAT, Kmcpt2C4AcylCoAMAT, Kmcpt2CarMAT, Keqcpt2, C12AcylCarMAT[t],  
 C16AcylCarMAT[t], C14AcylCarMAT[t], C10AcylCarMAT[t], C8AcylCarMAT[t],  
 C6AcylCarMAT[t], C4AcylCarMAT[t], CoAMAT, C12AcylCoAMAT[t], C16AcylCoAMAT[t],  
 C14AcylCoAMAT[t], C10AcylCoAMAT[t], C8AcylCoAMAT[t], C6AcylCoAMAT[t],  
 C4AcylCoAMAT[t], CarMAT, vmct1acet, kmct1acet, AcetateMAT, propacetcpt2],  
 vcpt2C10 → CPT2[sfcpt2C10, Vcpt2, Kmcpt2C10AcylCarMAT, Kmcpt2C16AcylCarMAT,  
 Kmcpt2C14AcylCarMAT, Kmcpt2C12AcylCarMAT, Kmcpt2C8AcylCarMAT, Kmcpt2C6AcylCarMAT,  
 Kmcpt2C4AcylCarMAT, Kmcpt2CoAMAT, Kmcpt2C10AcylCoAMAT, Kmcpt2C16AcylCoAMAT,  
 Kmcpt2C14AcylCoAMAT, Kmcpt2C12AcylCoAMAT, Kmcpt2C8AcylCoAMAT,  
 Kmcpt2C6AcylCoAMAT, Kmcpt2C4AcylCoAMAT, Kmcpt2CarMAT, Keqcpt2, C10AcylCarMAT[t],  
 C16AcylCarMAT[t], C14AcylCarMAT[t], C12AcylCarMAT[t], C8AcylCarMAT[t],  
 C6AcylCarMAT[t], C4AcylCarMAT[t], CoAMAT, C10AcylCoAMAT[t], C16AcylCoAMAT[t],  
 C14AcylCoAMAT[t], C12AcylCoAMAT[t], C8AcylCoAMAT[t], C6AcylCoAMAT[t],  
 C4AcylCoAMAT[t], CarMAT, vmct1acet, kmct1acet, AcetateMAT, propacetcpt2],  
 vcpt2C8 → CPT2[sfcpt2C8, Vcpt2, Kmcpt2C8AcylCarMAT, Kmcpt2C16AcylCarMAT,  
 Kmcpt2C14AcylCarMAT, Kmcpt2C12AcylCarMAT, Kmcpt2C10AcylCarMAT, Kmcpt2C6AcylCarMAT,  
 Kmcpt2C4AcylCarMAT, Kmcpt2CoAMAT, Kmcpt2C8AcylCoAMAT, Kmcpt2C16AcylCoAMAT,  
 Kmcpt2C14AcylCoAMAT, Kmcpt2C12AcylCoAMAT, Kmcpt2C10AcylCoAMAT,  
 Kmcpt2C6AcylCoAMAT, Kmcpt2C4AcylCoAMAT, Kmcpt2CarMAT, Keqcpt2, C8AcylCarMAT[t],  
 C16AcylCarMAT[t], C14AcylCarMAT[t], C12AcylCarMAT[t], C10AcylCarMAT[t],  
 C6AcylCarMAT[t], C4AcylCarMAT[t], CoAMAT, C8AcylCoAMAT[t], C16AcylCoAMAT[t],  
 C14AcylCoAMAT[t], C12AcylCoAMAT[t], C10AcylCoAMAT[t], C6AcylCoAMAT[t],  
 C4AcylCoAMAT[t], CarMAT, vmct1acet, kmct1acet, AcetateMAT, propacetcpt2],  
 vcpt2C6 → CPT2[sfcpt2C6, Vcpt2, Kmcpt2C6AcylCarMAT, Kmcpt2C16AcylCarMAT,  
 Kmcpt2C14AcylCarMAT, Kmcpt2C12AcylCarMAT, Kmcpt2C10AcylCarMAT, Kmcpt2C8AcylCarMAT,  
 Kmcpt2C4AcylCarMAT, Kmcpt2CoAMAT, Kmcpt2C6AcylCoAMAT, Kmcpt2C16AcylCoAMAT,  
 Kmcpt2C14AcylCoAMAT, Kmcpt2C12AcylCoAMAT, Kmcpt2C10AcylCoAMAT,  
 Kmcpt2C8AcylCoAMAT, Kmcpt2C4AcylCoAMAT, Kmcpt2CarMAT, Keqcpt2, C6AcylCarMAT[t],

C16AcylCarMAT[t], C14AcylCarMAT[t], C12AcylCarMAT[t], C10AcylCarMAT[t],  
 C8AcylCarMAT[t], C4AcylCarMAT[t], CoAMAT, C6AcylCoAMAT[t], C16AcylCoAMAT[t],  
 C14AcylCoAMAT[t], C12AcylCoAMAT[t], C10AcylCoAMAT[t], C8AcylCoAMAT[t],  
 C4AcylCoAMAT[t], CarMAT, vmct1acet, kmct1acet, AcetateMAT, propacetcpt2],  
 vcpt2C4 → CPT2[sfcpt2C4, Vcpt2, Kmcpt2C4AcylCarMAT, Kmcpt2C16AcylCarMAT,  
 Kmcpt2C14AcylCarMAT, Kmcpt2C12AcylCarMAT, Kmcpt2C10AcylCarMAT, Kmcpt2C8AcylCarMAT,  
 Kmcpt2C6AcylCarMAT, Kmcpt2CoAMAT, Kmcpt2C4AcylCoAMAT, Kmcpt2C16AcylCoAMAT,  
 Kmcpt2C14AcylCoAMAT, Kmcpt2C12AcylCoAMAT, Kmcpt2C10AcylCoAMAT,  
 Kmcpt2C8AcylCoAMAT, Kmcpt2C6AcylCoAMAT, Kmcpt2CarMAT, Keqcpt2, C4AcylCarMAT[t],  
 C16AcylCarMAT[t], C14AcylCarMAT[t], C12AcylCarMAT[t], C10AcylCarMAT[t],  
 C8AcylCarMAT[t], C6AcylCarMAT[t], CoAMAT, C4AcylCoAMAT[t], C16AcylCoAMAT[t],  
 C14AcylCoAMAT[t], C12AcylCoAMAT[t], C10AcylCoAMAT[t], C8AcylCoAMAT[t],  
 C6AcylCoAMAT[t], CarMAT, vmct1acet, kmct1acet, AcetateMAT, propacetcpt2],  
 vvlcadC16 → VLCAD[sfvlcadC16, Vvlcad, KmvlcadC16AcylCoAMAT, KmvlcadC14AcylCoAMAT,  
 KmvlcadC12AcylCoAMAT, KmvlcadFAD, KmvlcadC16EnoylCoAMAT,  
 KmvlcadC14EnoylCoAMAT, KmvlcadC12EnoylCoAMAT, KmvlcadFADH, Keqvlcad,  
 C16AcylCoAMAT[t], C14AcylCoAMAT[t], C12AcylCoAMAT[t], FADtMAT,  
 C16EnoylCoAMAT[t], C14EnoylCoAMAT[t], C12EnoylCoAMAT[t], FADHtMAT[t]],  
 vvlcadC14 → VLCAD[sfvlcadC14, Vvlcad, KmvlcadC14AcylCoAMAT, KmvlcadC16AcylCoAMAT,  
 KmvlcadC12AcylCoAMAT, KmvlcadFAD, KmvlcadC14EnoylCoAMAT,  
 KmvlcadC16EnoylCoAMAT, KmvlcadC12EnoylCoAMAT, KmvlcadFADH, Keqvlcad,  
 C14AcylCoAMAT[t], C16AcylCoAMAT[t], C12AcylCoAMAT[t], FADtMAT,  
 C14EnoylCoAMAT[t], C16EnoylCoAMAT[t], C12EnoylCoAMAT[t], FADHtMAT[t]],  
 vvlcadC12 → VLCAD[sfvlcadC12, Vvlcad, KmvlcadC12AcylCoAMAT, KmvlcadC16AcylCoAMAT,  
 KmvlcadC14AcylCoAMAT, KmvlcadFAD, KmvlcadC12EnoylCoAMAT,  
 KmvlcadC16EnoylCoAMAT, KmvlcadC14EnoylCoAMAT, KmvlcadFADH, Keqvlcad,  
 C12AcylCoAMAT[t], C16AcylCoAMAT[t], C14AcylCoAMAT[t], FADtMAT,  
 C12EnoylCoAMAT[t], C16EnoylCoAMAT[t], C14EnoylCoAMAT[t], FADHtMAT[t]],  
 vlcadC16 → LCAD[sflcadC16, Vlcad, KmlcadC16AcylCoAMAT, KmlcadC14AcylCoAMAT,  
 KmlcadC12AcylCoAMAT, KmlcadC10AcylCoAMAT, KmlcadC8AcylCoAMAT, KmlcadFAD,  
 KmlcadC16EnoylCoAMAT, KmlcadC14EnoylCoAMAT, KmlcadC12EnoylCoAMAT,  
 KmlcadC10EnoylCoAMAT, KmlcadC8EnoylCoAMAT, KmlcadFADH, Keqlcad,  
 C16AcylCoAMAT[t], C14AcylCoAMAT[t], C12AcylCoAMAT[t], C10AcylCoAMAT[t],  
 C8AcylCoAMAT[t], FADtMAT, C16EnoylCoAMAT[t], C14EnoylCoAMAT[t],  
 C12EnoylCoAMAT[t], C10EnoylCoAMAT[t], C8EnoylCoAMAT[t], FADHtMAT[t]],  
 vlcadC14 → LCAD[sflcadC14, Vlcad, KmlcadC14AcylCoAMAT, KmlcadC16AcylCoAMAT,  
 KmlcadC12AcylCoAMAT, KmlcadC10AcylCoAMAT, KmlcadC8AcylCoAMAT, KmlcadFAD,  
 KmlcadC14EnoylCoAMAT, KmlcadC16EnoylCoAMAT, KmlcadC12EnoylCoAMAT,  
 KmlcadC10EnoylCoAMAT, KmlcadC8EnoylCoAMAT, KmlcadFADH, Keqlcad,  
 C14AcylCoAMAT[t], C16AcylCoAMAT[t], C12AcylCoAMAT[t], C10AcylCoAMAT[t],  
 C8AcylCoAMAT[t], FADtMAT, C14EnoylCoAMAT[t], C16EnoylCoAMAT[t],  
 C12EnoylCoAMAT[t], C10EnoylCoAMAT[t], C8EnoylCoAMAT[t], FADHtMAT[t]],  
 vlcadC12 → LCAD[sflcadC12, Vlcad, KmlcadC12AcylCoAMAT, KmlcadC16AcylCoAMAT,  
 KmlcadC14AcylCoAMAT, KmlcadC10AcylCoAMAT, KmlcadC8AcylCoAMAT, KmlcadFAD,  
 KmlcadC12EnoylCoAMAT, KmlcadC16EnoylCoAMAT, KmlcadC14EnoylCoAMAT,  
 KmlcadC10EnoylCoAMAT, KmlcadC8EnoylCoAMAT, KmlcadFADH, Keqlcad,  
 C12AcylCoAMAT[t], C16AcylCoAMAT[t], C14AcylCoAMAT[t], C10AcylCoAMAT[t],  
 C8AcylCoAMAT[t], FADtMAT, C14EnoylCoAMAT[t], C16EnoylCoAMAT[t],  
 C14EnoylCoAMAT[t], C10EnoylCoAMAT[t], C8EnoylCoAMAT[t], FADHtMAT[t]],  
 vlcadC10 → LCAD[sflcadC10, Vlcad, KmlcadC10AcylCoAMAT, KmlcadC16AcylCoAMAT,  
 KmlcadC14AcylCoAMAT, KmlcadC12AcylCoAMAT, KmlcadC8AcylCoAMAT, KmlcadFAD,  
 KmlcadC10EnoylCoAMAT, KmlcadC16EnoylCoAMAT, KmlcadC14EnoylCoAMAT,  
 KmlcadC12EnoylCoAMAT, KmlcadC8EnoylCoAMAT, KmlcadFADH, Keqlcad,  
 C10AcylCoAMAT[t], C16AcylCoAMAT[t], C14AcylCoAMAT[t], C12AcylCoAMAT[t],  
 C8AcylCoAMAT[t], FADtMAT, C10EnoylCoAMAT[t], C16EnoylCoAMAT[t],

C14EnoylCoAMAT[t], C12EnoylCoAMAT[t], C8EnoylCoAMAT[t], FADHMAT[t]],  
 vlcdC8 → LCAD[sflcdC8, Vlcd, KmlcdC8AcylCoAMAT, KmlcdC16AcylCoAMAT,  
 KmlcdC14AcylCoAMAT, KmlcdC12AcylCoAMAT, KmlcdC10AcylCoAMAT, KmlcdFAD,  
 KmlcdC8EnoylCoAMAT, KmlcdC16EnoylCoAMAT, KmlcdC14EnoylCoAMAT,  
 KmlcdC12EnoylCoAMAT, KmlcdC10EnoylCoAMAT, KmlcdFADH, Keqlcd,  
 C8AcylCoAMAT[t], C16AcylCoAMAT[t], C14AcylCoAMAT[t], C12AcylCoAMAT[t],  
 C10AcylCoAMAT[t], FADtMAT, C8EnoylCoAMAT[t], C16EnoylCoAMAT[t],  
 C14EnoylCoAMAT[t], C12EnoylCoAMAT[t], C10EnoylCoAMAT[t], FADHMAT[t]],  
 vmcdC12 → MCAD[sfmcadC12, Vmcd, KmmcdC12AcylCoAMAT, KmmcdC10AcylCoAMAT,  
 KmmcdC8AcylCoAMAT, KmmcdC6AcylCoAMAT, KmmcdC4AcylCoAMAT, KmmcdFAD,  
 KmmcdC12EnoylCoAMAT, KmmcdC10EnoylCoAMAT, KmmcdC8EnoylCoAMAT,  
 KmmcdC6EnoylCoAMAT, KmmcdC4EnoylCoAMAT, KmmcdFADH, Keqmcad,  
 C12AcylCoAMAT[t], C10AcylCoAMAT[t], C8AcylCoAMAT[t], C6AcylCoAMAT[t],  
 C4AcylCoAMAT[t], FADtMAT, C12EnoylCoAMAT[t], C10EnoylCoAMAT[t],  
 C8EnoylCoAMAT[t], C6EnoylCoAMAT[t], C4EnoylCoAMAT[t], FADHMAT[t]],  
 vmcdC10 → MCAD[sfmcadC10, Vmcd, KmmcdC10AcylCoAMAT, KmmcdC12AcylCoAMAT,  
 KmmcdC8AcylCoAMAT, KmmcdC6AcylCoAMAT, KmmcdC4AcylCoAMAT, KmmcdFAD,  
 KmmcdC10EnoylCoAMAT, KmmcdC12EnoylCoAMAT, KmmcdC8EnoylCoAMAT,  
 KmmcdC6EnoylCoAMAT, KmmcdC4EnoylCoAMAT, KmmcdFADH, Keqmcad,  
 C10AcylCoAMAT[t], C12AcylCoAMAT[t], C8AcylCoAMAT[t], C6AcylCoAMAT[t],  
 C4AcylCoAMAT[t], FADtMAT, C10EnoylCoAMAT[t], C12EnoylCoAMAT[t],  
 C8EnoylCoAMAT[t], C6EnoylCoAMAT[t], C4EnoylCoAMAT[t], FADHMAT[t]],  
 vmcdC8 → MCAD[sfmcadC8, Vmcd, KmmcdC8AcylCoAMAT, KmmcdC12AcylCoAMAT,  
 KmmcdC10AcylCoAMAT, KmmcdC6AcylCoAMAT, KmmcdC4AcylCoAMAT, KmmcdFAD,  
 KmmcdC8EnoylCoAMAT, KmmcdC12EnoylCoAMAT, KmmcdC10EnoylCoAMAT,  
 KmmcdC6EnoylCoAMAT, KmmcdC4EnoylCoAMAT, KmmcdFADH, Keqmcad,  
 C8AcylCoAMAT[t], C12AcylCoAMAT[t], C10AcylCoAMAT[t], C6AcylCoAMAT[t],  
 C4AcylCoAMAT[t], FADtMAT, C8EnoylCoAMAT[t], C12EnoylCoAMAT[t],  
 C10EnoylCoAMAT[t], C6EnoylCoAMAT[t], C4EnoylCoAMAT[t], FADHMAT[t]],  
 vmcdC6 → MCAD[sfmcadC6, Vmcd, KmmcdC6AcylCoAMAT, KmmcdC12AcylCoAMAT,  
 KmmcdC10AcylCoAMAT, KmmcdC8AcylCoAMAT, KmmcdC4AcylCoAMAT, KmmcdFAD,  
 KmmcdC6EnoylCoAMAT, KmmcdC12EnoylCoAMAT, KmmcdC10EnoylCoAMAT,  
 KmmcdC8EnoylCoAMAT, KmmcdC4EnoylCoAMAT, KmmcdFADH, Keqmcad,  
 C6AcylCoAMAT[t], C12AcylCoAMAT[t], C10AcylCoAMAT[t], C8AcylCoAMAT[t],  
 C4AcylCoAMAT[t], FADtMAT, C6EnoylCoAMAT[t], C12EnoylCoAMAT[t],  
 C10EnoylCoAMAT[t], C8EnoylCoAMAT[t], C4EnoylCoAMAT[t], FADHMAT[t]],  
 vmcdC4 → MCAD[sfmcadC4, Vmcd, KmmcdC4AcylCoAMAT, KmmcdC12AcylCoAMAT,  
 KmmcdC10AcylCoAMAT, KmmcdC8AcylCoAMAT, KmmcdC6AcylCoAMAT, KmmcdFAD,  
 KmmcdC4EnoylCoAMAT, KmmcdC12EnoylCoAMAT, KmmcdC10EnoylCoAMAT,  
 KmmcdC8EnoylCoAMAT, KmmcdC6EnoylCoAMAT, KmmcdFADH, Keqmcad,  
 C4AcylCoAMAT[t], C12AcylCoAMAT[t], C10AcylCoAMAT[t], C8AcylCoAMAT[t],  
 C6AcylCoAMAT[t], FADtMAT, C4EnoylCoAMAT[t], C12EnoylCoAMAT[t],  
 C10EnoylCoAMAT[t], C8EnoylCoAMAT[t], C6EnoylCoAMAT[t], FADHMAT[t]],  
 vscadC6 → SCAD[sfscadC6, Vscad, KmscadC6AcylCoAMAT, KmscadC4AcylCoAMAT, KmscadFAD,  
 KmscadC6EnoylCoAMAT, KmscadC4EnoylCoAMAT, KmscadFADH, Keqscad, C6AcylCoAMAT[t],  
 C4AcylCoAMAT[t], FADtMAT, C6EnoylCoAMAT[t], C4EnoylCoAMAT[t], FADHMAT[t]],  
 vscadC4 → SCAD[sfscadC4, Vscad, KmscadC4AcylCoAMAT, KmscadC6AcylCoAMAT, KmscadFAD,  
 KmscadC4EnoylCoAMAT, KmscadC6EnoylCoAMAT, KmscadFADH, Keqscad, C4AcylCoAMAT[t],  
 C6AcylCoAMAT[t], FADtMAT, C4EnoylCoAMAT[t], C6EnoylCoAMAT[t], FADHMAT[t]],  
 vcrotC16 → CROT[sfcrotC16, Vcrot, KmcrotC16EnoylCoAMAT, KmcrotC14EnoylCoAMAT,  
 KmcrotC12EnoylCoAMAT, KmcrotC10EnoylCoAMAT, KmcrotC8EnoylCoAMAT,  
 KmcrotC6EnoylCoAMAT, KmcrotC4EnoylCoAMAT, KmcrotC16HydroxyacylCoAMAT,  
 KmcrotC14HydroxyacylCoAMAT, KmcrotC12HydroxyacylCoAMAT,  
 KmcrotC10HydroxyacylCoAMAT, KmcrotC8HydroxyacylCoAMAT,  
 KmcrotC6HydroxyacylCoAMAT, KmcrotC4HydroxyacylCoAMAT, KicrotC4AcetoacylCoA,



Keqcrot, C16EnoylCoAMAT[t], C14EnoylCoAMAT[t], C12EnoylCoAMAT[t],  
 C10EnoylCoAMAT[t], C8EnoylCoAMAT[t], C6EnoylCoAMAT[t],  
 C4EnoylCoAMAT[t], C16HydroxyacylCoAMAT[t], C14HydroxyacylCoAMAT[t],  
 C12HydroxyacylCoAMAT[t], C10HydroxyacylCoAMAT[t], C8HydroxyacylCoAMAT[t],  
 C6HydroxyacylCoAMAT[t], C4HydroxyacylCoAMAT[t], C4AcetoacylCoAMAT[t]],  
 vcrotC14 → CROT[sfcrotC14, Vcrot, KmcrotC14EnoylCoAMAT, KmcrotC16EnoylCoAMAT,  
 KmcrotC12EnoylCoAMAT, KmcrotC10EnoylCoAMAT, KmcrotC8EnoylCoAMAT,  
 KmcrotC6EnoylCoAMAT, KmcrotC4EnoylCoAMAT, KmcrotC14HydroxyacylCoAMAT,  
 KmcrotC16HydroxyacylCoAMAT, KmcrotC12HydroxyacylCoAMAT,  
 KmcrotC10HydroxyacylCoAMAT, KmcrotC8HydroxyacylCoAMAT,  
 KmcrotC6HydroxyacylCoAMAT, KmcrotC4HydroxyacylCoAMAT, KicrotC4AcetoacylCoA,  
 Keqcrot, C14EnoylCoAMAT[t], C16EnoylCoAMAT[t], C12EnoylCoAMAT[t],  
 C10EnoylCoAMAT[t], C8EnoylCoAMAT[t], C6EnoylCoAMAT[t],  
 C4EnoylCoAMAT[t], C14HydroxyacylCoAMAT[t], C16HydroxyacylCoAMAT[t],  
 C12HydroxyacylCoAMAT[t], C10HydroxyacylCoAMAT[t], C8HydroxyacylCoAMAT[t],  
 C6HydroxyacylCoAMAT[t], C4HydroxyacylCoAMAT[t], C4AcetoacylCoAMAT[t]],  
 vcrotC12 → CROT[sfcrotC12, Vcrot, KmcrotC12EnoylCoAMAT, KmcrotC16EnoylCoAMAT,  
 KmcrotC14EnoylCoAMAT, KmcrotC10EnoylCoAMAT, KmcrotC8EnoylCoAMAT,  
 KmcrotC6EnoylCoAMAT, KmcrotC4EnoylCoAMAT, KmcrotC12HydroxyacylCoAMAT,  
 KmcrotC16HydroxyacylCoAMAT, KmcrotC14HydroxyacylCoAMAT,  
 KmcrotC10HydroxyacylCoAMAT, KmcrotC8HydroxyacylCoAMAT,  
 KmcrotC6HydroxyacylCoAMAT, KmcrotC4HydroxyacylCoAMAT, KicrotC4AcetoacylCoA,  
 Keqcrot, C12EnoylCoAMAT[t], C16EnoylCoAMAT[t], C14EnoylCoAMAT[t],  
 C10EnoylCoAMAT[t], C8EnoylCoAMAT[t], C6EnoylCoAMAT[t],  
 C4EnoylCoAMAT[t], C12HydroxyacylCoAMAT[t], C16HydroxyacylCoAMAT[t],  
 C14HydroxyacylCoAMAT[t], C10HydroxyacylCoAMAT[t], C8HydroxyacylCoAMAT[t],  
 C6HydroxyacylCoAMAT[t], C4HydroxyacylCoAMAT[t], C4AcetoacylCoAMAT[t]],  
 vcrotC10 → CROT[sfcrotC10, Vcrot, KmcrotC10EnoylCoAMAT, KmcrotC16EnoylCoAMAT,  
 KmcrotC14EnoylCoAMAT, KmcrotC12EnoylCoAMAT, KmcrotC8EnoylCoAMAT,  
 KmcrotC6EnoylCoAMAT, KmcrotC4EnoylCoAMAT, KmcrotC10HydroxyacylCoAMAT,  
 KmcrotC16HydroxyacylCoAMAT, KmcrotC14HydroxyacylCoAMAT,  
 KmcrotC12HydroxyacylCoAMAT, KmcrotC8HydroxyacylCoAMAT,  
 KmcrotC6HydroxyacylCoAMAT, KmcrotC4HydroxyacylCoAMAT, KicrotC4AcetoacylCoA,  
 Keqcrot, C10EnoylCoAMAT[t], C16EnoylCoAMAT[t], C14EnoylCoAMAT[t],  
 C12EnoylCoAMAT[t], C8EnoylCoAMAT[t], C6EnoylCoAMAT[t],  
 C4EnoylCoAMAT[t], C10HydroxyacylCoAMAT[t], C16HydroxyacylCoAMAT[t],  
 C14HydroxyacylCoAMAT[t], C12HydroxyacylCoAMAT[t], C8HydroxyacylCoAMAT[t],  
 C6HydroxyacylCoAMAT[t], C4HydroxyacylCoAMAT[t], C4AcetoacylCoAMAT[t]],  
 vcrotC8 → CROT[sfcrotC8, Vcrot, KmcrotC8EnoylCoAMAT, KmcrotC16EnoylCoAMAT,  
 KmcrotC14EnoylCoAMAT, KmcrotC12EnoylCoAMAT, KmcrotC10EnoylCoAMAT,  
 KmcrotC6EnoylCoAMAT, KmcrotC4EnoylCoAMAT, KmcrotC8HydroxyacylCoAMAT,  
 KmcrotC16HydroxyacylCoAMAT, KmcrotC14HydroxyacylCoAMAT,  
 KmcrotC12HydroxyacylCoAMAT, KmcrotC10HydroxyacylCoAMAT,  
 KmcrotC6HydroxyacylCoAMAT, KmcrotC4HydroxyacylCoAMAT, KicrotC4AcetoacylCoA,  
 Keqcrot, C8EnoylCoAMAT[t], C16EnoylCoAMAT[t], C14EnoylCoAMAT[t],  
 C12EnoylCoAMAT[t], C10EnoylCoAMAT[t], C6EnoylCoAMAT[t],  
 C4EnoylCoAMAT[t], C8HydroxyacylCoAMAT[t], C16HydroxyacylCoAMAT[t],  
 C14HydroxyacylCoAMAT[t], C12HydroxyacylCoAMAT[t], C10HydroxyacylCoAMAT[t],  
 C6HydroxyacylCoAMAT[t], C4HydroxyacylCoAMAT[t], C4AcetoacylCoAMAT[t]],  
 vcrotC6 → CROT[sfcrotC6, Vcrot, KmcrotC6EnoylCoAMAT, KmcrotC16EnoylCoAMAT,  
 KmcrotC14EnoylCoAMAT, KmcrotC12EnoylCoAMAT, KmcrotC10EnoylCoAMAT,  
 KmcrotC8EnoylCoAMAT, KmcrotC4EnoylCoAMAT, KmcrotC6HydroxyacylCoAMAT,  
 KmcrotC16HydroxyacylCoAMAT, KmcrotC14HydroxyacylCoAMAT,  
 KmcrotC12HydroxyacylCoAMAT, KmcrotC10HydroxyacylCoAMAT,  
 KmcrotC8HydroxyacylCoAMAT, KmcrotC4HydroxyacylCoAMAT, KicrotC4AcetoacylCoA,

Keqcrot, C6EnoylCoAMAT[t], C16EnoylCoAMAT[t], C14EnoylCoAMAT[t],  
 C12EnoylCoAMAT[t], C10EnoylCoAMAT[t], C8EnoylCoAMAT[t],  
 C4EnoylCoAMAT[t], C6HydroxyacylCoAMAT[t], C16HydroxyacylCoAMAT[t],  
 C14HydroxyacylCoAMAT[t], C12HydroxyacylCoAMAT[t], C10HydroxyacylCoAMAT[t],  
 C8HydroxyacylCoAMAT[t], C4HydroxyacylCoAMAT[t], C4AcetoacylCoAMAT[t]],  
 vcrotC4 → CROT[sfcrotC4, Vcrot, KmcrotC4EnoylCoAMAT, KmcrotC16EnoylCoAMAT,  
 KmcrotC14EnoylCoAMAT, KmcrotC12EnoylCoAMAT, KmcrotC10EnoylCoAMAT,  
 KmcrotC8EnoylCoAMAT, KmcrotC6EnoylCoAMAT, KmcrotC4HydroxyacylCoAMAT,  
 KmcrotC16HydroxyacylCoAMAT, KmcrotC14HydroxyacylCoAMAT,  
 KmcrotC12HydroxyacylCoAMAT, KmcrotC10HydroxyacylCoAMAT,  
 KmcrotC8HydroxyacylCoAMAT, KmcrotC6HydroxyacylCoAMAT, KicrotC4AcetoacylCoA,  
 Keqcrot, C4EnoylCoAMAT[t], C16EnoylCoAMAT[t], C14EnoylCoAMAT[t],  
 C12EnoylCoAMAT[t], C10EnoylCoAMAT[t], C8EnoylCoAMAT[t],  
 C6EnoylCoAMAT[t], C4HydroxyacylCoAMAT[t], C16HydroxyacylCoAMAT[t],  
 C14HydroxyacylCoAMAT[t], C12HydroxyacylCoAMAT[t], C10HydroxyacylCoAMAT[t],  
 C8HydroxyacylCoAMAT[t], C6HydroxyacylCoAMAT[t], C4AcetoacylCoAMAT[t]],  
 vmschadC16 → MSCHAD[sfmschadC16, Vmschad, KmmschadC16HydroxyacylCoAMAT,  
 KmmschadC14HydroxyacylCoAMAT, KmmschadC12HydroxyacylCoAMAT,  
 KmmschadC10HydroxyacylCoAMAT, KmmschadC8HydroxyacylCoAMAT,  
 KmmschadC6HydroxyacylCoAMAT, KmmschadC4HydroxyacylCoAMAT,  
 KmmschadNADMAT, KmmschadC16KetoacylCoAMAT, KmmschadC14KetoacylCoAMAT,  
 KmmschadC12KetoacylCoAMAT, KmmschadC10KetoacylCoAMAT, KmmschadC8KetoacylCoAMAT,  
 KmmschadC6KetoacylCoAMAT, KmmschadC4AcetoacylCoAMAT, KmmschadNADHMAT,  
 Keqmschad, C16HydroxyacylCoAMAT[t], C14HydroxyacylCoAMAT[t],  
 C12HydroxyacylCoAMAT[t], C10HydroxyacylCoAMAT[t], C8HydroxyacylCoAMAT[t],  
 C6HydroxyacylCoAMAT[t], C4HydroxyacylCoAMAT[t], NADtMAT, C16KetoacylCoAMAT[t],  
 C14KetoacylCoAMAT[t], C12KetoacylCoAMAT[t], C10KetoacylCoAMAT[t],  
 C8KetoacylCoAMAT[t], C6KetoacylCoAMAT[t], C4AcetoacylCoAMAT[t], NADHMAT[t]],  
 vmschadC14 → MSCHAD[sfmschadC14, Vmschad, KmmschadC14HydroxyacylCoAMAT,  
 KmmschadC16HydroxyacylCoAMAT, KmmschadC12HydroxyacylCoAMAT,  
 KmmschadC10HydroxyacylCoAMAT, KmmschadC8HydroxyacylCoAMAT,  
 KmmschadC6HydroxyacylCoAMAT, KmmschadC4HydroxyacylCoAMAT,  
 KmmschadNADMAT, KmmschadC14KetoacylCoAMAT, KmmschadC16KetoacylCoAMAT,  
 KmmschadC12KetoacylCoAMAT, KmmschadC10KetoacylCoAMAT, KmmschadC8KetoacylCoAMAT,  
 KmmschadC6KetoacylCoAMAT, KmmschadC4AcetoacylCoAMAT, KmmschadNADHMAT,  
 Keqmschad, C14HydroxyacylCoAMAT[t], C16HydroxyacylCoAMAT[t],  
 C12HydroxyacylCoAMAT[t], C10HydroxyacylCoAMAT[t], C8HydroxyacylCoAMAT[t],  
 C6HydroxyacylCoAMAT[t], C4HydroxyacylCoAMAT[t], NADtMAT, C14KetoacylCoAMAT[t],  
 C16KetoacylCoAMAT[t], C12KetoacylCoAMAT[t], C10KetoacylCoAMAT[t],  
 C8KetoacylCoAMAT[t], C6KetoacylCoAMAT[t], C4AcetoacylCoAMAT[t], NADHMAT[t]],  
 vmschadC12 → MSCHAD[sfmschadC12, Vmschad, KmmschadC12HydroxyacylCoAMAT,  
 KmmschadC16HydroxyacylCoAMAT, KmmschadC14HydroxyacylCoAMAT,  
 KmmschadC10HydroxyacylCoAMAT, KmmschadC8HydroxyacylCoAMAT,  
 KmmschadC6HydroxyacylCoAMAT, KmmschadC4HydroxyacylCoAMAT,  
 KmmschadNADMAT, KmmschadC12KetoacylCoAMAT, KmmschadC16KetoacylCoAMAT,  
 KmmschadC14KetoacylCoAMAT, KmmschadC10KetoacylCoAMAT, KmmschadC8KetoacylCoAMAT,  
 KmmschadC6KetoacylCoAMAT, KmmschadC4AcetoacylCoAMAT, KmmschadNADHMAT,  
 Keqmschad, C12HydroxyacylCoAMAT[t], C16HydroxyacylCoAMAT[t],  
 C14HydroxyacylCoAMAT[t], C10HydroxyacylCoAMAT[t], C8HydroxyacylCoAMAT[t],  
 C6HydroxyacylCoAMAT[t], C4HydroxyacylCoAMAT[t], NADtMAT, C12KetoacylCoAMAT[t],  
 C16KetoacylCoAMAT[t], C14KetoacylCoAMAT[t], C10KetoacylCoAMAT[t],  
 C8KetoacylCoAMAT[t], C6KetoacylCoAMAT[t], C4AcetoacylCoAMAT[t], NADHMAT[t]],  
 vmschadC10 → MSCHAD[sfmschadC10, Vmschad, KmmschadC10HydroxyacylCoAMAT,  
 KmmschadC16HydroxyacylCoAMAT, KmmschadC14HydroxyacylCoAMAT,  
 KmmschadC12HydroxyacylCoAMAT, KmmschadC8HydroxyacylCoAMAT,

KmmschadC6HydroxyacylCoAMAT, KmmschadC4HydroxyacylCoAMAT,  
 KmmschadNADMAT, KmmschadC10KetoacylCoAMAT, KmmschadC16KetoacylCoAMAT,  
 KmmschadC14KetoacylCoAMAT, KmmschadC12KetoacylCoAMAT, KmmschadC8KetoacylCoAMAT,  
 KmmschadC6KetoacylCoAMAT, KmmschadC4AcetoacylCoAMAT, KmmschadNADHMAT,  
 Keqmschad, C10HydroxyacylCoAMAT[t], C16HydroxyacylCoAMAT[t],  
 C14HydroxyacylCoAMAT[t], C12HydroxyacylCoAMAT[t], C8HydroxyacylCoAMAT[t],  
 C6HydroxyacylCoAMAT[t], C4HydroxyacylCoAMAT[t], NADtMAT, C10KetoacylCoAMAT[t],  
 C16KetoacylCoAMAT[t], C14KetoacylCoAMAT[t], C12KetoacylCoAMAT[t],  
 C8KetoacylCoAMAT[t], C6KetoacylCoAMAT[t], C4AcetoacylCoAMAT[t], NADHMAT[t]],  
 vmschadC8 → MSCHAD[sfmschadC8, Vmschad, KmmschadC8HydroxyacylCoAMAT,  
 KmmschadC16HydroxyacylCoAMAT, KmmschadC14HydroxyacylCoAMAT,  
 KmmschadC12HydroxyacylCoAMAT, KmmschadC10HydroxyacylCoAMAT,  
 KmmschadC6HydroxyacylCoAMAT, KmmschadC4HydroxyacylCoAMAT,  
 KmmschadNADMAT, KmmschadC8KetoacylCoAMAT, KmmschadC16KetoacylCoAMAT,  
 KmmschadC14KetoacylCoAMAT, KmmschadC12KetoacylCoAMAT, KmmschadC10KetoacylCoAMAT,  
 KmmschadC6KetoacylCoAMAT, KmmschadC4AcetoacylCoAMAT, KmmschadNADHMAT,  
 Keqmschad, C8HydroxyacylCoAMAT[t], C16HydroxyacylCoAMAT[t],  
 C14HydroxyacylCoAMAT[t], C12HydroxyacylCoAMAT[t], C10HydroxyacylCoAMAT[t],  
 C6HydroxyacylCoAMAT[t], C4HydroxyacylCoAMAT[t], NADtMAT, C8KetoacylCoAMAT[t],  
 C16KetoacylCoAMAT[t], C14KetoacylCoAMAT[t], C12KetoacylCoAMAT[t],  
 C10KetoacylCoAMAT[t], C6KetoacylCoAMAT[t], C4AcetoacylCoAMAT[t], NADHMAT[t]],  
 vmschadC6 → MSCHAD[sfmschadC6, Vmschad, KmmschadC6HydroxyacylCoAMAT,  
 KmmschadC16HydroxyacylCoAMAT, KmmschadC14HydroxyacylCoAMAT,  
 KmmschadC12HydroxyacylCoAMAT, KmmschadC10HydroxyacylCoAMAT,  
 KmmschadC8HydroxyacylCoAMAT, KmmschadC4HydroxyacylCoAMAT,  
 KmmschadNADMAT, KmmschadC6KetoacylCoAMAT, KmmschadC16KetoacylCoAMAT,  
 KmmschadC14KetoacylCoAMAT, KmmschadC12KetoacylCoAMAT, KmmschadC10KetoacylCoAMAT,  
 KmmschadC8KetoacylCoAMAT, KmmschadC4AcetoacylCoAMAT, KmmschadNADHMAT,  
 Keqmschad, C6HydroxyacylCoAMAT[t], C16HydroxyacylCoAMAT[t],  
 C14HydroxyacylCoAMAT[t], C12HydroxyacylCoAMAT[t], C10HydroxyacylCoAMAT[t],  
 C8HydroxyacylCoAMAT[t], C4HydroxyacylCoAMAT[t], NADtMAT, C6KetoacylCoAMAT[t],  
 C16KetoacylCoAMAT[t], C14KetoacylCoAMAT[t], C12KetoacylCoAMAT[t],  
 C10KetoacylCoAMAT[t], C8KetoacylCoAMAT[t], C4AcetoacylCoAMAT[t], NADHMAT[t]],  
 vmschadC4 → MSCHAD[sfmschadC4, Vmschad, KmmschadC4HydroxyacylCoAMAT,  
 KmmschadC16HydroxyacylCoAMAT, KmmschadC14HydroxyacylCoAMAT,  
 KmmschadC12HydroxyacylCoAMAT, KmmschadC10HydroxyacylCoAMAT,  
 KmmschadC8HydroxyacylCoAMAT, KmmschadC6HydroxyacylCoAMAT,  
 KmmschadNADMAT, KmmschadC4AcetoacylCoAMAT, KmmschadC16KetoacylCoAMAT,  
 KmmschadC14KetoacylCoAMAT, KmmschadC12KetoacylCoAMAT, KmmschadC10KetoacylCoAMAT,  
 KmmschadC8KetoacylCoAMAT, KmmschadC6KetoacylCoAMAT, KmmschadNADHMAT,  
 Keqmschad, C4HydroxyacylCoAMAT[t], C16HydroxyacylCoAMAT[t],  
 C14HydroxyacylCoAMAT[t], C12HydroxyacylCoAMAT[t], C10HydroxyacylCoAMAT[t],  
 C8HydroxyacylCoAMAT[t], C6HydroxyacylCoAMAT[t], NADtMAT, C4AcetoacylCoAMAT[t],  
 C16KetoacylCoAMAT[t], C14KetoacylCoAMAT[t], C12KetoacylCoAMAT[t],  
 C10KetoacylCoAMAT[t], C8KetoacylCoAMAT[t], C6KetoacylCoAMAT[t], NADHMAT[t]],  
 vmckatC16 → MCKATA[sfmckatC16, Vmckat, KmmckatC16KetoacylCoAMAT,  
 KmmckatC14KetoacylCoAMAT, KmmckatC12KetoacylCoAMAT, KmmckatC10KetoacylCoAMAT,  
 KmmckatC8KetoacylCoAMAT, KmmckatC6KetoacylCoAMAT, KmmckatC4AcetoacylCoAMAT,  
 KmmckatCoAMAT, KmmckatC14AcylCoAMAT, KmmckatC16AcylCoAMAT, KmmckatC12AcylCoAMAT,  
 KmmckatC10AcylCoAMAT, KmmckatC8AcylCoAMAT, KmmckatC6AcylCoAMAT,  
 KmmckatC4AcylCoAMAT, KmmckatAcetylCoAMAT, Keqmckat, C16KetoacylCoAMAT[t],  
 C14KetoacylCoAMAT[t], C12KetoacylCoAMAT[t], C10KetoacylCoAMAT[t],  
 C8KetoacylCoAMAT[t], C6KetoacylCoAMAT[t], C4AcetoacylCoAMAT[t], CoAMAT,  
 C14AcylCoAMAT[t], C16AcylCoAMAT[t], C12AcylCoAMAT[t], C10AcylCoAMAT[t],  
 C8AcylCoAMAT[t], C6AcylCoAMAT[t], C4AcylCoAMAT[t], AcetylCoAMAT[t],

CE1, KmCE1, nE1, vmct1acet, kmct1acet, AcetateMAT, propacetmckat],  
 vmckatC14 → MCKATA[sfmckatC14, Vmckat, KmmckatC14KetoacylCoAMAT,  
 KmmckatC16KetoacylCoAMAT, KmmckatC12KetoacylCoAMAT, KmmckatC10KetoacylCoAMAT,  
 KmmckatC8KetoacylCoAMAT, KmmckatC6KetoacylCoAMAT, KmmckatC4AcetoacylCoAMAT,  
 KmmckatCoAMAT, KmmckatC12AcylCoAMAT, KmmckatC16AcylCoAMAT, KmmckatC14AcylCoAMAT,  
 KmmckatC10AcylCoAMAT, KmmckatC8AcylCoAMAT, KmmckatC6AcylCoAMAT,  
 KmmckatC4AcylCoAMAT, KmmckatAcetylCoAMAT, Keqmckat, C14KetoacylCoAMAT[t],  
 C16KetoacylCoAMAT[t], C12KetoacylCoAMAT[t], C10KetoacylCoAMAT[t],  
 C8KetoacylCoAMAT[t], C6KetoacylCoAMAT[t], C4AcetoacylCoAMAT[t], CoAMAT,  
 C12AcylCoAMAT[t], C16AcylCoAMAT[t], C14AcylCoAMAT[t], C10AcylCoAMAT[t],  
 C8AcylCoAMAT[t], C6AcylCoAMAT[t], C4AcylCoAMAT[t], AcetylCoAMAT[t],  
 CE1, KmCE1, nE1, vmct1acet, kmct1acet, AcetateMAT, propacetmckat],  
 vmckatC12 → MCKATA[sfmckatC12, Vmckat, KmmckatC12KetoacylCoAMAT,  
 KmmckatC16KetoacylCoAMAT, KmmckatC14KetoacylCoAMAT, KmmckatC10KetoacylCoAMAT,  
 KmmckatC8KetoacylCoAMAT, KmmckatC6KetoacylCoAMAT, KmmckatC4AcetoacylCoAMAT,  
 KmmckatCoAMAT, KmmckatC10AcylCoAMAT, KmmckatC16AcylCoAMAT, KmmckatC14AcylCoAMAT,  
 KmmckatC12AcylCoAMAT, KmmckatC8AcylCoAMAT, KmmckatC6AcylCoAMAT,  
 KmmckatC4AcylCoAMAT, KmmckatAcetylCoAMAT, Keqmckat, C12KetoacylCoAMAT[t],  
 C16KetoacylCoAMAT[t], C14KetoacylCoAMAT[t], C10KetoacylCoAMAT[t],  
 C8KetoacylCoAMAT[t], C6KetoacylCoAMAT[t], C4AcetoacylCoAMAT[t], CoAMAT,  
 C10AcylCoAMAT[t], C16AcylCoAMAT[t], C14AcylCoAMAT[t], C12AcylCoAMAT[t],  
 C8AcylCoAMAT[t], C6AcylCoAMAT[t], C4AcylCoAMAT[t], AcetylCoAMAT[t],  
 CE1, KmCE1, nE1, vmct1acet, kmct1acet, AcetateMAT, propacetmckat],  
 vmckatC10 → MCKATA[sfmckatC10, Vmckat, KmmckatC10KetoacylCoAMAT,  
 KmmckatC16KetoacylCoAMAT, KmmckatC14KetoacylCoAMAT, KmmckatC12KetoacylCoAMAT,  
 KmmckatC8KetoacylCoAMAT, KmmckatC6KetoacylCoAMAT, KmmckatC4AcetoacylCoAMAT,  
 KmmckatCoAMAT, KmmckatC8AcylCoAMAT, KmmckatC16AcylCoAMAT, KmmckatC14AcylCoAMAT,  
 KmmckatC12AcylCoAMAT, KmmckatC10AcylCoAMAT, KmmckatC6AcylCoAMAT,  
 KmmckatC4AcylCoAMAT, KmmckatAcetylCoAMAT, Keqmckat, C10KetoacylCoAMAT[t],  
 C16KetoacylCoAMAT[t], C14KetoacylCoAMAT[t], C12KetoacylCoAMAT[t],  
 C8KetoacylCoAMAT[t], C6KetoacylCoAMAT[t], C4AcetoacylCoAMAT[t], CoAMAT,  
 C8AcylCoAMAT[t], C16AcylCoAMAT[t], C14AcylCoAMAT[t], C12AcylCoAMAT[t],  
 C10AcylCoAMAT[t], C6AcylCoAMAT[t], C4AcylCoAMAT[t], AcetylCoAMAT[t],  
 CE1, KmCE1, nE1, vmct1acet, kmct1acet, AcetateMAT, propacetmckat],  
 vmckatC8 → MCKATA[sfmckatC8, Vmckat, KmmckatC8KetoacylCoAMAT,  
 KmmckatC16KetoacylCoAMAT, KmmckatC14KetoacylCoAMAT, KmmckatC12KetoacylCoAMAT,  
 KmmckatC10KetoacylCoAMAT, KmmckatC6KetoacylCoAMAT, KmmckatC4AcetoacylCoAMAT,  
 KmmckatCoAMAT, KmmckatC6AcylCoAMAT, KmmckatC16AcylCoAMAT, KmmckatC14AcylCoAMAT,  
 KmmckatC12AcylCoAMAT, KmmckatC10AcylCoAMAT, KmmckatC8AcylCoAMAT,  
 KmmckatC4AcylCoAMAT, KmmckatAcetylCoAMAT, Keqmckat, C8KetoacylCoAMAT[t],  
 C16KetoacylCoAMAT[t], C14KetoacylCoAMAT[t], C12KetoacylCoAMAT[t],  
 C10KetoacylCoAMAT[t], C6KetoacylCoAMAT[t], C4AcetoacylCoAMAT[t], CoAMAT,  
 C6AcylCoAMAT[t], C16AcylCoAMAT[t], C14AcylCoAMAT[t], C12AcylCoAMAT[t],  
 C10AcylCoAMAT[t], C8AcylCoAMAT[t], C4AcylCoAMAT[t], AcetylCoAMAT[t],  
 CE1, KmCE1, nE1, vmct1acet, kmct1acet, AcetateMAT, propacetmckat],  
 vmckatC6 → MCKATA[sfmckatC6, Vmckat, KmmckatC6KetoacylCoAMAT,  
 KmmckatC16KetoacylCoAMAT, KmmckatC14KetoacylCoAMAT, KmmckatC12KetoacylCoAMAT,  
 KmmckatC10KetoacylCoAMAT, KmmckatC8KetoacylCoAMAT, KmmckatC4AcetoacylCoAMAT,  
 KmmckatCoAMAT, KmmckatC4AcylCoAMAT, KmmckatC16AcylCoAMAT, KmmckatC14AcylCoAMAT,  
 KmmckatC12AcylCoAMAT, KmmckatC10AcylCoAMAT, KmmckatC8AcylCoAMAT,  
 KmmckatC6AcylCoAMAT, KmmckatAcetylCoAMAT, Keqmckat, C6KetoacylCoAMAT[t],  
 C16KetoacylCoAMAT[t], C14KetoacylCoAMAT[t], C12KetoacylCoAMAT[t],  
 C10KetoacylCoAMAT[t], C8KetoacylCoAMAT[t], C4AcetoacylCoAMAT[t], CoAMAT,  
 C4AcylCoAMAT[t], C16AcylCoAMAT[t], C14AcylCoAMAT[t], C12AcylCoAMAT[t],  
 C10AcylCoAMAT[t], C8AcylCoAMAT[t], C6AcylCoAMAT[t], AcetylCoAMAT[t],

CE1, KmCE1, nE1, vmct1acet, kmct1acet, AcetateMAT, propacetmckat],  
 vmckatC4 → MCKATB[sfmckatC4, Vmckat, KmmckatC4AcetoacylCoAMAT,  
 KmmckatC16KetoacylCoAMAT, KmmckatC14KetoacylCoAMAT, KmmckatC12KetoacylCoAMAT,  
 KmmckatC10KetoacylCoAMAT, KmmckatC8KetoacylCoAMAT, KmmckatC6KetoacylCoAMAT,  
 KmmckatCoAMAT, KmmckatC4AcylCoAMAT, KmmckatC16AcylCoAMAT, KmmckatC14AcylCoAMAT,  
 KmmckatC12AcylCoAMAT, KmmckatC10AcylCoAMAT, KmmckatC8AcylCoAMAT,  
 KmmckatC6AcylCoAMAT, KmmckatAcetylCoAMAT, Keqmckat, C4AcetoacylCoAMAT[t],  
 C16KetoacylCoAMAT[t], C14KetoacylCoAMAT[t], C12KetoacylCoAMAT[t],  
 C10KetoacylCoAMAT[t], C8KetoacylCoAMAT[t], C6KetoacylCoAMAT[t], CoAMAT,  
 C4AcylCoAMAT[t], C16AcylCoAMAT[t], C14AcylCoAMAT[t], C12AcylCoAMAT[t],  
 C10AcylCoAMAT[t], C8AcylCoAMAT[t], C6AcylCoAMAT[t], AcetylCoAMAT[t],  
 CE1, KmCE1, nE1, vmct1acet, kmct1acet, AcetateMAT, propacetmckat],  
 vmtpC16 → MTP[sfvmtpC16, Vmtp, KmmtpC16EnoylCoAMAT, KmmtpC14EnoylCoAMAT,  
 KmmtpC12EnoylCoAMAT, KmmtpC10EnoylCoAMAT, KmmtpC8EnoylCoAMAT,  
 KmmtpNADMAT, KmmtpCoAMAT, KmmtpC14AcylCoAMAT, KmmtpC16AcylCoAMAT,  
 KmmtpC12AcylCoAMAT, KmmtpC10AcylCoAMAT, KmmtpC8AcylCoAMAT,  
 KmmtpC6AcylCoAMAT, KmmtpNADHMAT, KmmtpAcetylCoAMAT, KicrotC4AcetoacylCoA,  
 Keqmt, C16EnoylCoAMAT[t], C14EnoylCoAMAT[t], C12EnoylCoAMAT[t],  
 C10EnoylCoAMAT[t], C8EnoylCoAMAT[t], NADtMAT, CoAMAT, C14AcylCoAMAT[t],  
 C16AcylCoAMAT[t], C12AcylCoAMAT[t], C10AcylCoAMAT[t], C8AcylCoAMAT[t],  
 C6AcylCoAMAT[t], NADHMAT[t], AcetylCoAMAT[t], C4AcetoacylCoAMAT[t]],  
 vmtpC14 → MTP[sfvmtpC14, Vmtp, KmmtpC14EnoylCoAMAT, KmmtpC16EnoylCoAMAT,  
 KmmtpC12EnoylCoAMAT, KmmtpC10EnoylCoAMAT, KmmtpC8EnoylCoAMAT,  
 KmmtpNADMAT, KmmtpCoAMAT, KmmtpC12AcylCoAMAT, KmmtpC16AcylCoAMAT,  
 KmmtpC14AcylCoAMAT, KmmtpC10AcylCoAMAT, KmmtpC8AcylCoAMAT,  
 KmmtpC6AcylCoAMAT, KmmtpNADHMAT, KmmtpAcetylCoAMAT, KicrotC4AcetoacylCoA,  
 Keqmt, C14EnoylCoAMAT[t], C16EnoylCoAMAT[t], C12EnoylCoAMAT[t],  
 C10EnoylCoAMAT[t], C8EnoylCoAMAT[t], NADtMAT, CoAMAT, C12AcylCoAMAT[t],  
 C16AcylCoAMAT[t], C14AcylCoAMAT[t], C10AcylCoAMAT[t], C8AcylCoAMAT[t],  
 C6AcylCoAMAT[t], NADHMAT[t], AcetylCoAMAT[t], C4AcetoacylCoAMAT[t]],  
 vmtpC12 → MTP[sfvmtpC12, Vmtp, KmmtpC12EnoylCoAMAT, KmmtpC16EnoylCoAMAT,  
 KmmtpC14EnoylCoAMAT, KmmtpC10EnoylCoAMAT, KmmtpC8EnoylCoAMAT,  
 KmmtpNADMAT, KmmtpCoAMAT, KmmtpC10AcylCoAMAT, KmmtpC16AcylCoAMAT,  
 KmmtpC14AcylCoAMAT, KmmtpC12AcylCoAMAT, KmmtpC8AcylCoAMAT,  
 KmmtpC6AcylCoAMAT, KmmtpNADHMAT, KmmtpAcetylCoAMAT, KicrotC4AcetoacylCoA,  
 Keqmt, C12EnoylCoAMAT[t], C16EnoylCoAMAT[t], C14EnoylCoAMAT[t],  
 C10EnoylCoAMAT[t], C8EnoylCoAMAT[t], NADtMAT, CoAMAT, C10AcylCoAMAT[t],  
 C16AcylCoAMAT[t], C14AcylCoAMAT[t], C12AcylCoAMAT[t], C8AcylCoAMAT[t],  
 C6AcylCoAMAT[t], NADHMAT[t], AcetylCoAMAT[t], C4AcetoacylCoAMAT[t]],  
 vmtpC10 → MTP[sfvmtpC10, Vmtp, KmmtpC10EnoylCoAMAT, KmmtpC16EnoylCoAMAT,  
 KmmtpC14EnoylCoAMAT, KmmtpC12EnoylCoAMAT, KmmtpC8EnoylCoAMAT,  
 KmmtpNADMAT, KmmtpCoAMAT, KmmtpC8AcylCoAMAT, KmmtpC16AcylCoAMAT,  
 KmmtpC14AcylCoAMAT, KmmtpC12AcylCoAMAT, KmmtpC10AcylCoAMAT,  
 KmmtpC6AcylCoAMAT, KmmtpNADHMAT, KmmtpAcetylCoAMAT, KicrotC4AcetoacylCoA,  
 Keqmt, C10EnoylCoAMAT[t], C16EnoylCoAMAT[t], C14EnoylCoAMAT[t],  
 C12EnoylCoAMAT[t], C8EnoylCoAMAT[t], NADtMAT, CoAMAT, C8AcylCoAMAT[t],  
 C16AcylCoAMAT[t], C14AcylCoAMAT[t], C12AcylCoAMAT[t], C10AcylCoAMAT[t],  
 C6AcylCoAMAT[t], NADHMAT[t], AcetylCoAMAT[t], C4AcetoacylCoAMAT[t]],  
 vmtpC8 → MTP[sfvmtpC8, Vmtp, KmmtpC8EnoylCoAMAT, KmmtpC16EnoylCoAMAT,  
 KmmtpC14EnoylCoAMAT, KmmtpC12EnoylCoAMAT, KmmtpC10EnoylCoAMAT,  
 KmmtpNADMAT, KmmtpCoAMAT, KmmtpC6AcylCoAMAT, KmmtpC16AcylCoAMAT,  
 KmmtpC14AcylCoAMAT, KmmtpC12AcylCoAMAT, KmmtpC10AcylCoAMAT,  
 KmmtpC8AcylCoAMAT, KmmtpNADHMAT, KmmtpAcetylCoAMAT, KicrotC4AcetoacylCoA,  
 Keqmt, C8EnoylCoAMAT[t], C16EnoylCoAMAT[t], C14EnoylCoAMAT[t],  
 C12EnoylCoAMAT[t], C10EnoylCoAMAT[t], NADtMAT, CoAMAT, C6AcylCoAMAT[t],

```

C16AcylCoAMAT[t], C14AcylCoAMAT[t], C12AcylCoAMAT[t], C10AcylCoAMAT[t],
C8AcylCoAMAT[t], NADHMAT[t], AcetylCoAMAT[t], C4AcetoacylCoAMAT[t]],
vacesink → RES[Ksacesink, AcetylCoAMAT[t], K1acesink],
vfadhsink → RES[Ksfadhsink, FADHMAT[t], K1fadhsink],
voxphnadh → OXPH[VmaxOxPh, KmnadhOxPh, KmnadOxPh,
NADHMAT[t], NADtMAT - NADHMAT[t], vmct1acet, kmct1acet, AcetateMAT],
vpdhnad → PDH[Vmaxpdh, KmnadPDH, KmnadhPDH, NADtMAT - NADHMAT[t], NADHMAT[t]]
};

```

CoAMATX =

```

{CoAMAT → CoAMATt - C16AcylCoAMAT[t] - C16EnoylCoAMAT[t] - C16HydroxyacylCoAMAT[t] -
C16KetoacylCoAMAT[t] - C14AcylCoAMAT[t] - C14EnoylCoAMAT[t] -
C14HydroxyacylCoAMAT[t] - C14KetoacylCoAMAT[t] - C12AcylCoAMAT[t] -
C12EnoylCoAMAT[t] - C12HydroxyacylCoAMAT[t] - C12KetoacylCoAMAT[t] -
C10AcylCoAMAT[t] - C10EnoylCoAMAT[t] - C10HydroxyacylCoAMAT[t] -
C10KetoacylCoAMAT[t] - C8AcylCoAMAT[t] - C8EnoylCoAMAT[t] - C8HydroxyacylCoAMAT[t] -
C8KetoacylCoAMAT[t] - C6AcylCoAMAT[t] - C6EnoylCoAMAT[t] - C6HydroxyacylCoAMAT[t] -
C6KetoacylCoAMAT[t] - C4AcylCoAMAT[t] - C4EnoylCoAMAT[t] - C4HydroxyacylCoAMAT[t] -
C4AcetoacylCoAMAT[t] - AcetylCoAMAT[t]}; (*COATCA[t]};*)

```

Parm = {

```

sfcpt1C16 → 1, Vcpt1 → 0.012, Kmcpt1C16AcylCoACYT → 13.8,
Kmcpt1CarCYT → 250, Kmcpt1C16AcylCarCYT → 136, Kmcpt1CoACYT → 40.7,
Kicpt1MalCoACYT → 9.1, Keqcpt1 → 0.45, ncpt1 → 2.4799,
Vfcact → 0.42, Vrcact → 0.42, KmcactC16AcylCarCYT → 15,
KmcactC14AcylCarCYT → 15, KmcactC12AcylCarCYT → 15, KmcactC10AcylCarCYT → 15,
KmcactC8AcylCarCYT → 15, KmcactC6AcylCarCYT → 15, KmcactC4AcylCarCYT → 15,
KmcactCarMAT → 130, KmcactC16AcylCarMAT → 15, KmcactC14AcylCarMAT → 15,
KmcactC12AcylCarMAT → 15, KmcactC10AcylCarMAT → 15, KmcactC8AcylCarMAT → 15,
KmcactC6AcylCarMAT → 15, KmcactC4AcylCarMAT → 15, KmcactCarCYT → 130,
KicactC16AcylCarCYT → 56, KicactC14AcylCarCYT → 56, KicactC12AcylCarCYT → 56,
KicactC10AcylCarCYT → 56, KicactC8AcylCarCYT → 56, KicactC6AcylCarCYT → 56,
KicactC4AcylCarCYT → 56, KicactCarCYT → 200, Keqcact → 1,
sfcpt2C16 → 0.85, sfcpt2C14 → 1, sfcpt2C12 → 0.95, sfcpt2C10 → 0.95,
sfcpt2C8 → 0.35, sfcpt2C6 → 0.15, sfcpt2C4 → 0.01, Vcpt2 → 0.391,
Kmcpt2C16AcylCarMAT → 51, Kmcpt2C14AcylCarMAT → 51, Kmcpt2C12AcylCarMAT → 51,
Kmcpt2C10AcylCarMAT → 51, Kmcpt2C8AcylCarMAT → 51, Kmcpt2C6AcylCarMAT → 51,
Kmcpt2C4AcylCarMAT → 51, Kmcpt2CoAMAT → 30, Kmcpt2C16AcylCoAMAT → 38,
Kmcpt2C14AcylCoAMAT → 38, Kmcpt2C12AcylCoAMAT → 38,
Kmcpt2C10AcylCoAMAT → 38, Kmcpt2C8AcylCoAMAT → 38, Kmcpt2C6AcylCoAMAT → 1000,
Kmcpt2C4AcylCoAMAT → 1000000, Kmcpt2CarMAT → 350, Keqcpt2 → 2.22,
sfvlcadC16 → 1, sfvlcadC14 → 0.42, sfvlcadC12 → 0.11, Vvlcad → 0.008,
KmvlcadC16AcylCoAMAT → 6.5, KmvlcadC14AcylCoAMAT → 4, KmvlcadC12AcylCoAMAT → 2.7,
KmvlcadFAD → 0.12, KmvlcadC16EnoylCoAMAT → 1.08, KmvlcadC14EnoylCoAMAT → 1.08,
KmvlcadC12EnoylCoAMAT → 1.08, KmvlcadFADH → 24.2, Keqvlcad → 6,
sflcadC16 → 0.9, sflcadC14 → 1, sflcadC12 → 0.9, sflcadC10 → 0.75, sflcadC8 → 0.4,
Vlcad → 0.01, KmlcadC16AcylCoAMAT → 2.5, KmlcadC14AcylCoAMAT → 7.4,
KmlcadC12AcylCoAMAT → 9, KmlcadC10AcylCoAMAT → 24.3, KmlcadC8AcylCoAMAT → 123,
KmlcadFAD → 0.12, KmlcadC16EnoylCoAMAT → 1.08, KmlcadC14EnoylCoAMAT → 1.08,
KmlcadC12EnoylCoAMAT → 1.08, KmlcadC10EnoylCoAMAT → 1.08,
KmlcadC8EnoylCoAMAT → 1.08, KmlcadFADH → 24.2, Keqlcad → 6,
sfmcadC12 → 0.38, sfmcadC10 → 0.8, sfmcadC8 → 0.87, sfmcadC6 → 1, sfmcadC4 → 0.12,

```

Vmcd → 0.081, KmmcdC12AcylCoAMAT → 5.7, KmmcdC10AcylCoAMAT → 5.4,  
 KmmcdC8AcylCoAMAT → 4, KmmcdC6AcylCoAMAT → 9.4, KmmcdC4AcylCoAMAT → 135,  
 KmmcdFAD → 0.12, KmmcdC12EnoylCoAMAT → 1.08, KmmcdC10EnoylCoAMAT → 1.08,  
 KmmcdC8EnoylCoAMAT → 1.08, KmmcdC6EnoylCoAMAT → 1.08,  
 KmmcdC4EnoylCoAMAT → 1.08, KmmcdFADH → 24.2, Keqmcad → 6,  
 sfscadC6 → 0.3, sfscadC4 → 1, Vscad → 0.081, KmscadC6AcylCoAMAT → 285,  
 KmscadC4AcylCoAMAT → 10.7, KmscadFAD → 0.12, KmscadC6EnoylCoAMAT → 1.08,  
 KmscadC4EnoylCoAMAT → 1.08, KmscadFADH → 24.2, Keqscad → 6,  
 sfcrotC16 → 0.13, sfcrotC14 → 0.2, sfcrotC12 → 0.25, sfcrotC10 → 0.33, sfcrotC8 → 0.58,  
 sfcrotC6 → 0.83, sfcrotC4 → 1, Vcrot → 3.6, KmcrotC16EnoylCoAMAT → 150,  
 KmcrotC14EnoylCoAMAT → 100, KmcrotC12EnoylCoAMAT → 25, KmcrotC10EnoylCoAMAT → 25,  
 KmcrotC8EnoylCoAMAT → 25, KmcrotC6EnoylCoAMAT → 25, KmcrotC4EnoylCoAMAT → 40,  
 KmcrotC16HydroxyacylCoAMAT → 45, KmcrotC14HydroxyacylCoAMAT → 45,  
 KmcrotC12HydroxyacylCoAMAT → 45, KmcrotC10HydroxyacylCoAMAT → 45,  
 KmcrotC8HydroxyacylCoAMAT → 45, KmcrotC6HydroxyacylCoAMAT → 45,  
 KmcrotC4HydroxyacylCoAMAT → 45, KicrotC4AcetoacylCoA → 1.6, Keqcrot → 3.13,  
 sfmschadC16 → 0.6, sfmschadC14 → 0.5, sfmschadC12 → 0.43, sfmschadC10 → 0.64,  
 sfmschadC8 → 0.89, sfmschadC6 → 1, sfmschadC4 → 0.67, Vmschad → 1,  
 KmmschadC16HydroxyacylCoAMAT → 1.5, KmmschadC14HydroxyacylCoAMAT → 1.8,  
 KmmschadC12HydroxyacylCoAMAT → 3.7, KmmschadC10HydroxyacylCoAMAT → 8.8,  
 KmmschadC8HydroxyacylCoAMAT → 16.3, KmmschadC6HydroxyacylCoAMAT → 28.6,  
 KmmschadC4HydroxyacylCoAMAT → 69.9, KmmschadNADMAT → 58.5,  
 KmmschadC16KetoacylCoAMAT → 1.4, KmmschadC14KetoacylCoAMAT → 1.4,  
 KmmschadC12KetoacylCoAMAT → 1.6, KmmschadC10KetoacylCoAMAT → 2.3,  
 KmmschadC8KetoacylCoAMAT → 4.1, KmmschadC6KetoacylCoAMAT → 5.8,  
 KmmschadC4AcetoacylCoAMAT → 16.9, KmmschadNADHMAT → 5.4, Keqmschad →  $2.17 \times 10^{-4}$ ,  
 sfmckatC16 → 0, sfmckatC14 → 0.2, sfmckatC12 → 0.38, sfmckatC10 → 0.65,  
 sfmckatC8 → 0.81, sfmckatC6 → 1, sfmckatC4 → 0.49, Vmckat → 0.377,  
 KmmckatC16KetoacylCoAMAT → 1.1, KmmckatC14KetoacylCoAMAT → 1.2,  
 KmmckatC12KetoacylCoAMAT → 1.3, KmmckatC10KetoacylCoAMAT → 2.1,  
 KmmckatC8KetoacylCoAMAT → 3.2, KmmckatC6KetoacylCoAMAT → 6.7,  
 KmmckatC4AcetoacylCoAMAT → 12.4, KmmckatCoAMAT → 26.6,  
 KmmckatC14AcylCoAMAT → 13.83, KmmckatC16AcylCoAMAT → 13.83,  
 KmmckatC12AcylCoAMAT → 13.83, KmmckatC10AcylCoAMAT → 13.83,  
 KmmckatC8AcylCoAMAT → 13.83, KmmckatC6AcylCoAMAT → 13.83,  
 KmmckatC4AcylCoAMAT → 13.83, KmmckatAcetylCoAMAT → 30, Keqmckat → 1051,  
 sfmtpC16 → 1, sfmtpC14 → 0.9, sfmtpC12 → 0.81, sfmtpC10 → 0.73, sfmtpC8 → 0.34,  
 Vmtp → 2.84, KmmtpC16EnoylCoAMAT → 25, KmmtpC14EnoylCoAMAT → 25,  
 KmmtpC12EnoylCoAMAT → 25, KmmtpC10EnoylCoAMAT → 25, KmmtpC8EnoylCoAMAT → 25,  
 KmmtpNADMAT → 60, KmmtpCoAMAT → 30, KmmtpC14AcylCoAMAT → 13.83,  
 KmmtpC16AcylCoAMAT → 13.83, KmmtpC12AcylCoAMAT → 13.83,  
 KmmtpC10AcylCoAMAT → 13.83, KmmtpC8AcylCoAMAT → 13.83, KmmtpC6AcylCoAMAT → 13.83,  
 KmmtpNADHMAT → 50, KmmtpAcetylCoAMAT → 30, Keqmtpt → 0.71,  
 Ksacesink → 6000000, K1acesink → 70, Ksfadhsink → 6000000,  
 K1fadhsink → 0.46, Ksnadhsink → 6000000, K1nadhsink → 12,  
 C16AcylCoACYT → 25, CarCYT → 200, CoACYT → 140, MalCoACYT → 0,  
 CarMAT → 950, FADtMAT → 0.77, NADtMAT → 250, CoAMATt → 5000,  
 VCYT →  $2.2 \times 10^{-6}$ , VMAT →  $1.8 \times 10^{-6}$ ,  
 CE1 → 50, KmCE1 → 50, nE1 → 1,  
 Vmaxoxph → 0.155 (\*0.137, 0.152, 1.791\*), KmnadhOxPh → 4.3,  
 KmnadOxPh → 780, VmaxPDH → 0.127, KmnadPDH → 60.7, KmnadhPDH → 40,  
 vmct1acet → 8.3, kmct1acet → 1.5, AcetateMAT → 0, propacetcpt1 → 0.12,  
 propacetsink → 0.13, propacetcact → 0, propacetcpt2 → 0,  
 propacetmal → 0, propacetcckat → 0 (\*0.1\*), nc → 2};

```
InitialConditions = {
  C16AcylCarCYT[0] == 0, C16AcylCarMAT[0] == 0, C16AcylCoAMAT[0] == 0,
  C16EnoylCoAMAT[0] == 0, C16HydroxyacylCoAMAT[0] == 0, C16KetoacylCoAMAT[0] == 0,
  C14AcylCarCYT[0] == 0, C14AcylCarMAT[0] == 0, C14AcylCoAMAT[0] == 0,
  C14EnoylCoAMAT[0] == 0, C14HydroxyacylCoAMAT[0] == 0, C14KetoacylCoAMAT[0] == 0,
  C12AcylCarCYT[0] == 0, C12AcylCarMAT[0] == 0, C12AcylCoAMAT[0] == 0,
  C12EnoylCoAMAT[0] == 0, C12HydroxyacylCoAMAT[0] == 0, C12KetoacylCoAMAT[0] == 0,
  C10AcylCarCYT[0] == 0, C10AcylCarMAT[0] == 0, C10AcylCoAMAT[0] == 0,
  C10EnoylCoAMAT[0] == 0, C10HydroxyacylCoAMAT[0] == 0, C10KetoacylCoAMAT[0] == 0,
  C8AcylCarCYT[0] == 0, C8AcylCarMAT[0] == 0, C8AcylCoAMAT[0] == 0,
  C8EnoylCoAMAT[0] == 0, C8HydroxyacylCoAMAT[0] == 0, C8KetoacylCoAMAT[0] == 0,
  C6AcylCarCYT[0] == 0, C6AcylCarMAT[0] == 0, C6AcylCoAMAT[0] == 0,
  C6EnoylCoAMAT[0] == 0, C6HydroxyacylCoAMAT[0] == 0, C6KetoacylCoAMAT[0] == 0,
  C4AcylCarCYT[0] == 0, C4AcylCarMAT[0] == 0, C4AcylCoAMAT[0] == 0,
  C4EnoylCoAMAT[0] == 0, C4HydroxyacylCoAMAT[0] == 0, C4AcetoacylCoAMAT[0] == 0,
  AcetylCoAMAT[0] == 70, FADHMAT[0] == 0.46, NADHMAT[0] == 12};
```

```
Vars = {
  C16AcylCarCYT, C16AcylCarMAT, C16AcylCoAMAT,
  C16EnoylCoAMAT, C16HydroxyacylCoAMAT, C16KetoacylCoAMAT,
  C14AcylCarCYT, C14AcylCarMAT, C14AcylCoAMAT, C14EnoylCoAMAT,
  C14HydroxyacylCoAMAT, C14KetoacylCoAMAT,
  C12AcylCarCYT, C12AcylCarMAT, C12AcylCoAMAT, C12EnoylCoAMAT,
  C12HydroxyacylCoAMAT, C12KetoacylCoAMAT,
  C10AcylCarCYT, C10AcylCarMAT, C10AcylCoAMAT, C10EnoylCoAMAT,
  C10HydroxyacylCoAMAT, C10KetoacylCoAMAT,
  C8AcylCarCYT, C8AcylCarMAT, C8AcylCoAMAT, C8EnoylCoAMAT,
  C8HydroxyacylCoAMAT, C8KetoacylCoAMAT,
  C6AcylCarCYT, C6AcylCarMAT, C6AcylCoAMAT, C6EnoylCoAMAT,
  C6HydroxyacylCoAMAT, C6KetoacylCoAMAT,
  C4AcylCarCYT, C4AcylCarMAT, C4AcylCoAMAT, C4EnoylCoAMAT,
  C4HydroxyacylCoAMAT, C4AcetoacylCoAMAT,
  AcetylCoAMAT, FADHMAT, NADHMAT};
```

```
In[ ]:= TableForm[Odes];
TableForm[RateEqs];
TableForm[Odes /. RateEqs /. CoAMATX /. Parm];
TableForm[RateEqs /. Parm];
TableForm[InitialConditions];
```

```
In[ ]:= tsol = NDSolve[Join[Odes /. RateEqs /. CoAMATX /. Parm, InitialConditions],
  Vars, {t, 0, 1000000000}];
```



```

In[ ]:= Table[{Vars[[i]][t], (Vars[[i]][900000000] /. tsol)[[1]]}, {i, 1, Length[Vars]}]

Out[ ]:= {{C16AcylCarCYT[t], 0.166282}, {C16AcylCarMAT[t], 0.34783},
  {C16AcylCoAMAT[t], 0.851861}, {C16EnoylCoAMAT[t], 0.0462384},
  {C16HydroxyacylCoAMAT[t], 0.144726}, {C16KetoacylCoAMAT[t], 0.000656667},
  {C14AcylCarCYT[t], 0.0363412}, {C14AcylCarMAT[t], 0.172621},
  {C14AcylCoAMAT[t], 1.8894}, {C14EnoylCoAMAT[t], 0.0515851},
  {C14HydroxyacylCoAMAT[t], 0.146228}, {C14KetoacylCoAMAT[t], 0.000662792},
  {C12AcylCarCYT[t], 0.0490286}, {C12AcylCarMAT[t], 0.232886},
  {C12AcylCoAMAT[t], 2.54902}, {C12EnoylCoAMAT[t], 0.0586393},
  {C12HydroxyacylCoAMAT[t], 0.177249}, {C12KetoacylCoAMAT[t], 0.000800836},
  {C10AcylCarCYT[t], 0.0852545}, {C10AcylCarMAT[t], 0.404959},
  {C10AcylCoAMAT[t], 4.43243}, {C10EnoylCoAMAT[t], 0.0644893},
  {C10HydroxyacylCoAMAT[t], 0.196237}, {C10KetoacylCoAMAT[t], 0.000883998},
  {C8AcylCarCYT[t], 0.0856958}, {C8AcylCarMAT[t], 0.407055},
  {C8AcylCoAMAT[t], 4.45537}, {C8EnoylCoAMAT[t], 0.139494},
  {C8HydroxyacylCoAMAT[t], 0.430973}, {C8KetoacylCoAMAT[t], 0.00194042},
  {C6AcylCarCYT[t], 0.226682}, {C6AcylCarMAT[t], 1.07674}, {C6AcylCoAMAT[t], 11.7853},
  {C6EnoylCoAMAT[t], 10.1182}, {C6HydroxyacylCoAMAT[t], 31.4843},
  {C6KetoacylCoAMAT[t], 0.141749}, {C4AcylCarCYT[t], 0.375688},
  {C4AcylCarMAT[t], 1.78452}, {C4AcylCoAMAT[t], 19.5322}, {C4EnoylCoAMAT[t], 38.0576},
  {C4HydroxyacylCoAMAT[t], 118.874}, {C4AcetoacylCoAMAT[t], 0.535337},
  {AcetylCoAMAT[t], 70.}, {FADHMAT[t], 0.46}, {NADHMAT[t], 11.4107}}

```

## Steady state computation with varying palmitoyl-CoA (X) and acetate levels (Z)

```

In[ ]:= ParmScan[X_, Z_] := {
  sfcpt1C16 → 1, Vcpt1 → 0.012, Kmcpt1C16AcylCoACYT → 13.8,
  Kmcpt1CarCYT → 250, Kmcpt1C16AcylCarCYT → 136, Kmcpt1CoACYT → 40.7,
  Kicpt1MalCoACYT → 9.1, Keqcpt1 → 0.45, ncpt1 → 2.4799,
  Vfcaact → 0.42, Vrcact → 0.42, KmcactC16AcylCarCYT → 15,
  KmcactC14AcylCarCYT → 15, KmcactC12AcylCarCYT → 15, KmcactC10AcylCarCYT → 15,
  KmcactC8AcylCarCYT → 15, KmcactC6AcylCarCYT → 15, KmcactC4AcylCarCYT → 15,
  KmcactCarMAT → 130, KmcactC16AcylCarMAT → 15, KmcactC14AcylCarMAT → 15,
  KmcactC12AcylCarMAT → 15, KmcactC10AcylCarMAT → 15, KmcactC8AcylCarMAT → 15,
  KmcactC6AcylCarMAT → 15, KmcactC4AcylCarMAT → 15, KmcactCarCYT → 130,
  KicactC16AcylCarCYT → 56, KicactC14AcylCarCYT → 56, KicactC12AcylCarCYT → 56,
  KicactC10AcylCarCYT → 56, KicactC8AcylCarCYT → 56, KicactC6AcylCarCYT → 56,
  KicactC4AcylCarCYT → 56, KicactCarCYT → 200, Keqcact → 1,
  sfcpt2C16 → 0.85, sfcpt2C14 → 1, sfcpt2C12 → 0.95, sfcpt2C10 → 0.95,
  sfcpt2C8 → 0.35, sfcpt2C6 → 0.15, sfcpt2C4 → 0.01, Vcpt2 → 0.391,
  Kmcpt2C16AcylCarMAT → 51, Kmcpt2C14AcylCarMAT → 51, Kmcpt2C12AcylCarMAT → 51,
  Kmcpt2C10AcylCarMAT → 51, Kmcpt2C8AcylCarMAT → 51, Kmcpt2C6AcylCarMAT → 51,
  Kmcpt2C4AcylCarMAT → 51, Kmcpt2CoAMAT → 30, Kmcpt2C16AcylCoAMAT → 38,
  Kmcpt2C14AcylCoAMAT → 38, Kmcpt2C12AcylCoAMAT → 38,
  Kmcpt2C10AcylCoAMAT → 38, Kmcpt2C8AcylCoAMAT → 38, Kmcpt2C6AcylCoAMAT → 1000,
  Kmcpt2C4AcylCoAMAT → 1000000, Kmcpt2CarMAT → 350, Keqcpt2 → 2.22,
  sflvcadC16 → 1, sflvcadC14 → 0.42, sflvcadC12 → 0.11, Vvlcad → 0.008,
  KmvlcadC16AcylCoAMAT → 6.5, KmvlcadC14AcylCoAMAT → 4, KmvlcadC12AcylCoAMAT → 2.7,
  KmvlcadFAD → 0.12, KmvlcadC16EnoylCoAMAT → 1.08, KmvlcadC14EnoylCoAMAT → 1.08,
  KmvlcadC12EnoylCoAMAT → 1.08, KmvlcadFADH → 24.2, Keqvlcad → 6,
  sflcadC16 → 0.9, sflcadC14 → 1, sflcadC12 → 0.9, sflcadC10 → 0.75, sflcadC8 → 0.4,
  Vlcad → 0.01, KmlcadC16AcylCoAMAT → 2.5, KmlcadC14AcylCoAMAT → 7.4,
  KmlcadC12AcylCoAMAT → 9, KmlcadC10AcylCoAMAT → 24.3, KmlcadC8AcylCoAMAT → 123,

```

KmlcadFAD → 0.12, KmlcadC16EnoylCoAMAT → 1.08, KmlcadC14EnoylCoAMAT → 1.08,  
 KmlcadC12EnoylCoAMAT → 1.08, KmlcadC10EnoylCoAMAT → 1.08,  
 KmlcadC8EnoylCoAMAT → 1.08, KmlcadFADH → 24.2, Keqlcad → 6,  
 sfmcadC12 → 0.38, sfmcadC10 → 0.8, sfmcadC8 → 0.87, sfmcadC6 → 1, sfmcadC4 → 0.12,  
 Vmcad → 0.081, KmmcadC12AcylCoAMAT → 5.7, KmmcadC10AcylCoAMAT → 5.4,  
 KmmcadC8AcylCoAMAT → 4, KmmcadC6AcylCoAMAT → 9.4, KmmcadC4AcylCoAMAT → 135,  
 KmmcadFAD → 0.12, KmmcadC12EnoylCoAMAT → 1.08, KmmcadC10EnoylCoAMAT → 1.08,  
 KmmcadC8EnoylCoAMAT → 1.08, KmmcadC6EnoylCoAMAT → 1.08,  
 KmmcadC4EnoylCoAMAT → 1.08, KmmcadFADH → 24.2, Keqmcad → 6,  
 sfscadC6 → 0.3, sfscadC4 → 1, Vscad → 0.081, KmscadC6AcylCoAMAT → 285,  
 KmscadC4AcylCoAMAT → 10.7, KmscadFAD → 0.12, KmscadC6EnoylCoAMAT → 1.08,  
 KmscadC4EnoylCoAMAT → 1.08, KmscadFADH → 24.2, Keqscad → 6,  
 sfrcrotC16 → 0.13, sfrcrotC14 → 0.2, sfrcrotC12 → 0.25, sfrcrotC10 → 0.33, sfrcrotC8 → 0.58,  
 sfrcrotC6 → 0.83, sfrcrotC4 → 1, Vrcrot → 3.6, KmcrotC16EnoylCoAMAT → 150,  
 KmcrotC14EnoylCoAMAT → 100, KmcrotC12EnoylCoAMAT → 25, KmcrotC10EnoylCoAMAT → 25,  
 KmcrotC8EnoylCoAMAT → 25, KmcrotC6EnoylCoAMAT → 25, KmcrotC4EnoylCoAMAT → 40,  
 KmcrotC16HydroxyacylCoAMAT → 45, KmcrotC14HydroxyacylCoAMAT → 45,  
 KmcrotC12HydroxyacylCoAMAT → 45, KmcrotC10HydroxyacylCoAMAT → 45,  
 KmcrotC8HydroxyacylCoAMAT → 45, KmcrotC6HydroxyacylCoAMAT → 45,  
 KmcrotC4HydroxyacylCoAMAT → 45, KicrotC4AcetoacylCoA → 1.6, Keqcrot → 3.13,  
 sfmschadC16 → 0.6, sfmschadC14 → 0.5, sfmschadC12 → 0.43, sfmschadC10 → 0.64,  
 sfmschadC8 → 0.89, sfmschadC6 → 1, sfmschadC4 → 0.67, Vmschad → 1,  
 KmmschadC16HydroxyacylCoAMAT → 1.5, KmmschadC14HydroxyacylCoAMAT → 1.8,  
 KmmschadC12HydroxyacylCoAMAT → 3.7, KmmschadC10HydroxyacylCoAMAT → 8.8,  
 KmmschadC8HydroxyacylCoAMAT → 16.3, KmmschadC6HydroxyacylCoAMAT → 28.6,  
 KmmschadC4HydroxyacylCoAMAT → 69.9, KmmschadNADMAT → 58.5,  
 KmmschadC16KetoacylCoAMAT → 1.4, KmmschadC14KetoacylCoAMAT → 1.4,  
 KmmschadC12KetoacylCoAMAT → 1.6, KmmschadC10KetoacylCoAMAT → 2.3,  
 KmmschadC8KetoacylCoAMAT → 4.1, KmmschadC6KetoacylCoAMAT → 5.8,  
 KmmschadC4AcetoacylCoAMAT → 16.9, KmmschadNADHMAT → 5.4, Keqmschad →  $2.17 \times 10^{-4}$ ,  
 sfmckatC16 → 0, sfmckatC14 → 0.2, sfmckatC12 → 0.38, sfmckatC10 → 0.65,  
 sfmckatC8 → 0.81, sfmckatC6 → 1, sfmckatC4 → 0.49, Vmckat → 0.377,  
 KmmckatC16KetoacylCoAMAT → 1.1, KmmckatC14KetoacylCoAMAT → 1.2,  
 KmmckatC12KetoacylCoAMAT → 1.3, KmmckatC10KetoacylCoAMAT → 2.1,  
 KmmckatC8KetoacylCoAMAT → 3.2, KmmckatC6KetoacylCoAMAT → 6.7,  
 KmmckatC4AcetoacylCoAMAT → 12.4, KmmckatCoAMAT → 26.6,  
 KmmckatC14AcylCoAMAT → 13.83, KmmckatC16AcylCoAMAT → 13.83,  
 KmmckatC12AcylCoAMAT → 13.83, KmmckatC10AcylCoAMAT → 13.83,  
 KmmckatC8AcylCoAMAT → 13.83, KmmckatC6AcylCoAMAT → 13.83,  
 KmmckatC4AcylCoAMAT → 13.83, KmmckatAcetylCoAMAT → 30, Keqmckat → 1051,  
 sfmtpC16 → 1, sfmtpC14 → 0.9, sfmtpC12 → 0.81, sfmtpC10 → 0.73, sfmtpC8 → 0.34,  
 Vmtp → 2.84, KmmtpC16EnoylCoAMAT → 25, KmmtpC14EnoylCoAMAT → 25,  
 KmmtpC12EnoylCoAMAT → 25, KmmtpC10EnoylCoAMAT → 25, KmmtpC8EnoylCoAMAT → 25,  
 KmmtpNADMAT → 60, KmmtpCoAMAT → 30, KmmtpC14AcylCoAMAT → 13.83,  
 KmmtpC16AcylCoAMAT → 13.83, KmmtpC12AcylCoAMAT → 13.83,  
 KmmtpC10AcylCoAMAT → 13.83, KmmtpC8AcylCoAMAT → 13.83, KmmtpC6AcylCoAMAT → 13.83,  
 KmmtpNADHMAT → 50, KmmtpAcetylCoAMAT → 30, Keqmtp → 0.71,  
 Ksacesink → 6000000, K1acesink → 70, Ksfadhsink → 6000000,  
 K1fadhsink → 0.46, Ksnadhsink → 6000000, K1nadhsink → 12,  
 C16AcylCoACYT → X, CarCYT → 200, CoACYT → 140, MalCoACYT → 0,  
 CarMAT → 950, FADtMAT → 0.77, NADtMAT → 250, CoAMATt → 5000,  
 VCYT →  $2.2 \times 10^{-6}$ , VMAT →  $1.8 \times 10^{-6}$ ,  
 CE1 → 50, KmCE1 → 50, nE1 → 1,  
 Vnadqo → 0.155 (\*0.137, 0.152, 1.791\*), KmnadhETC → 4.3,  
 KmnadETC → 780, VnadPDHo → 0.127, KmnadPDH → 60.7, KmnadhPDH → 40,

```

vmct1acet → 8.3, kmct1acet → 1.5, AcetateMAT → Z, propacetcpt1 → 0.12 ,
propacetsink → 0.13 , propacetcact → 0, propacetcpt2 → 0,
propacetmal → 0, propacetmckat → 0 (*0.1*), nc → 2};
tsolScan[X_, Z_] := NDSolve[Join[Odes /. RateEqs /. CoAMATX /. ParmScan[X, Z],
  InitialConditions], Vars, {t, 0, 1000000000}];

SsScan[X_, Z_] := Module[{SSGuess},
  SSGuess := Table[{Vars[[i]][t],
    (Vars[[i]][900000000] /. tsolScan[X, Z])[[1]]}, {i, 1, Length[Vars]}];
  FindRoot[Table[Odes[[i, 2]] == 0, {i, 1, Length[Odes]}] /. RateEqs /. CoAMATX /.
    ParmScan[X, Z], SSGuess]

In[ ]:= ScanDownNDSm[Ystart_, dY_, Yend_] := Monitor[Module[{SS, SSGuess},
  DataDownNDSfluxm = {};
  Xstart = 250;
  Xend = 0;
  YY = {0.0, 0.9};
  For[Y = Ystart, Y ≤ Yend,
    Z = YY[[Y]];
    tsolStart = tsolScan[Xend, Z];
    SSGuess = Table[{Vars[[i]][t],
      (Vars[[i]][900000000] /. tsolStart) [[1]]}, {i, 1, Length[Vars]}];
    SSGuess1 = SSGuess[[All, 1]];
    SSGuess2 = SSGuess[[All, 2]];
    SSGuess1int = SSGuess1 /. t → 0;
    InitialConditionsUD = Thread[SSGuess1int == SSGuess2];
    dX = 1;
    For[X = 250, X ≥ 0,
      tsolScanNDS = NDSolve[Join[Odes /. RateEqs /. CoAMATX /. ParmScan[X, Z],
        InitialConditionsUD], Vars, {t, 0, 1000000000}];
      SSGuess = Table[{Vars[[i]][t], (Vars[[i]][900000000] /. tsolScanNDS) [[1]]},
        {i, 1, Length[Vars]}];
      SSGuess1 = SSGuess[[All, 1]];
      SSGuess2 = SSGuess[[All, 2]];
      SSGuess1int = SSGuess1 /. t → 0;
      InitialConditionsUD = Thread[SSGuess1int == SSGuess2];
      SS = Thread[SSGuess1 → SSGuess2];

      AppendTo[DataDownNDSfluxm,
        {X, Z, 103 vcpt1C16 /. RateEqs /. CoAMATX /. ParmScan[X, Z] /. SS}];
      X = X - dX;];
      Y = Y + dY;]
], ProgressIndicator[X, {Xstart, Xend}]]

In[ ]:= ScanDownNDSm[1, 1, 2]

```

```

In[ ]:= ScanUpNDSm[Ystart_, dY_, Yend_] := Monitor[Module[{SS, SSGuess},
  DataUpNDSfluxm = {};
  Xstart = 0;
  Xend = 250;
  YY = {0.0, 0.9};
  For[Y = Ystart, Y ≤ Yend,
    Z = YY[[Y]];
    tsolStart = tsolScan[Xstart, Z];
    SSGuess = Table[{Vars[[i]][t],
      (Vars[[i]][900000000] /. tsolStart)[[1]]}, {i, 1, Length[Vars]}];
    SSGuess1 = SSGuess[[All, 1]];
    SSGuess2 = SSGuess[[All, 2]];
    SSGuess1int = SSGuess1 /. t → 0;
    InitialConditionsUD = Thread[SSGuess1int == SSGuess2];

    dX = 1;
    For[X = 0, X ≤ 250,

      tsolScanNDS = NDSolve[Join[Odes /. RateEqs /. CoAMATX /. ParmScan[X, Z],
        InitialConditionsUD], Vars, {t, 0, 1000000000}];
      SSGuess = Table[{Vars[[i]][t], (Vars[[i]][900000000] /. tsolScanNDS)[[1]]},
        {i, 1, Length[Vars]}];
      SSGuess1 = SSGuess[[All, 1]];
      SSGuess2 = SSGuess[[All, 2]];
      SSGuess1int = SSGuess1 /. t → 0;
      InitialConditionsUD = Thread[SSGuess1int == SSGuess2];
      SS = Thread[SSGuess1 → SSGuess2];

      AppendTo[DataUpNDSfluxm,
        {X, Z, 103 vcpt1C16 /. RateEqs /. CoAMATX /. ParmScan[X, Z] /. SS}];

      X = X + dX;];
    Y = Y + dY;]
], ProgressIndicator[X, {Xstart, Xend}]]

In[ ]:= ScanUpNDSm[1, 1, 2]

```

```

In[ ]:= p5new =
  ListLinePlot[{DataUpNDSfluxm[[1 ;; 251, {1, 3}]], DataUpNDSfluxm[[252 ;; 502, {1, 3}]],
    DataDownNDSfluxm[[1 ;; 251, {1, 3}]], DataDownNDSfluxm[[252 ;; 502, {1, 3}]]},
  PlotRange → All, PlotStyle → {Red, Blue, Red, Blue},
  AxesStyle → Directive[Black, 16], LabelStyle → Directive[Black],
  PlotLegends → Placed[LineLegend[{"0 mM", "3 mM"}, LabelStyle → {FontSize → 16}],
    {Center, Bottom}], PlotLabel → "Acetate levels",
  Frame → {{True, False}, {True, False}}, FrameLabel →
    {"Uptake Flux ( $\mu\text{mol}\cdot\text{min}^{-1}\cdot\text{gProtein}^{-1}$ )", None}, {"Palmitoyl-CoA ( $\mu\text{M}$ )", None}},
  BaseStyle → {FontSize → 18, FontWeight → "3", AbsoluteThickness[2]},
  FrameStyle → Thickness[0.00005], ImageSize → Scaled[0.30], AspectRatio → 0.75]

```

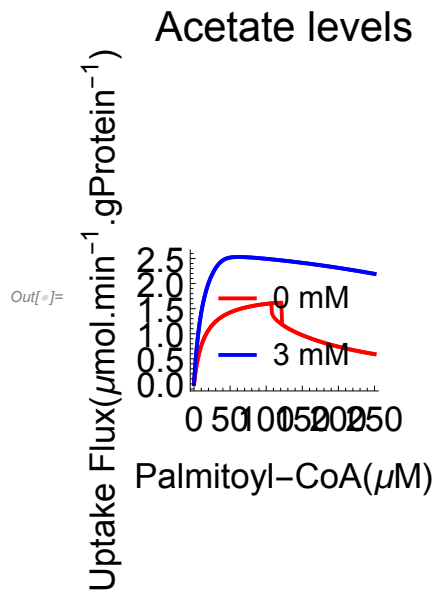

Supplement: S14 (10.1371/journal.pcbi.1009259.s014) [file journal.pcbi.1009259.s014]
